# Supplementary material
Source: PubMed Central journal article supplement (PMC4407245)
Supplement: mmc2.pdf [file mmc2.pdf]

## Article

# Mitochondrial Networks in Cardiac Myocytes Reveal Dynamic Coupling Behavior

Felix T. Kurz,<sup>1,2,3</sup> Thomas Derungs,<sup>1,4</sup> Miguel A. Aon,<sup>5</sup> Brian O'Rourke,<sup>5</sup> and Antonis A. Armoundas<sup>1,\*</sup>

<sup>1</sup>Massachusetts General Hospital, Cardiovascular Research Center, Harvard Medical School, Charlestown, Massachusetts; <sup>2</sup>Department of Neuroradiology, Heidelberg University Hospital, Heidelberg, Germany; <sup>3</sup>Department of Cardiology, Charité Universitätsmedizin Berlin, Berlin, Germany; <sup>4</sup>Experimental and Clinical Research Center, Max-Delbrück Center for Molecular Medicine and Charité Universitätsmedizin Berlin, Berlin, Germany; and <sup>5</sup>Division of Cardiology, Department of Medicine, Johns Hopkins University, Baltimore, Maryland

**ABSTRACT** Oscillatory behavior of mitochondrial inner membrane potential ( $\Delta\Psi_m$ ) is commonly observed in cells subjected to oxidative or metabolic stress. In cardiac myocytes, the activation of inner membrane pores by reactive oxygen species (ROS) is a major factor mediating intermitochondrial coupling, and ROS-induced ROS release has been shown to underlie propagated waves of  $\Delta\Psi_m$  depolarization as well as synchronized limit cycle oscillations of  $\Delta\Psi_m$  in the network. The functional impact of  $\Delta\Psi_m$  instability on cardiac electrophysiology,  $\text{Ca}^{2+}$  handling, and even cell survival, is strongly affected by the extent of such intermitochondrial coupling. Here, we employ a recently developed wavelet-based analytical approach to examine how different substrates affect mitochondrial coupling in cardiac cells, and we also determine the oscillatory coupling properties of mitochondria in ventricular cells in intact perfused hearts. The results show that the frequency of  $\Delta\Psi_m$  oscillations varies inversely with the size of the oscillating mitochondrial cluster, and depends on the strength of local intermitochondrial coupling. Time-varying coupling constants could be quantitatively determined by applying a stochastic phase model based on extension of the well-known Kuramoto model for networks of coupled oscillators. Cluster size-frequency relationships varied with different substrates, as did mitochondrial coupling constants, which were significantly larger for glucose ( $7.78 \times 10^{-2} \pm 0.98 \times 10^{-2} \text{ s}^{-1}$ ) and pyruvate ( $7.49 \times 10^{-2} \pm 1.65 \times 10^{-2} \text{ s}^{-1}$ ) than lactate ( $4.83 \times 10^{-2} \pm 1.25 \times 10^{-2} \text{ s}^{-1}$ ) or  $\beta$ -hydroxybutyrate ( $4.11 \times 10^{-2} \pm 0.62 \times 10^{-2} \text{ s}^{-1}$ ). The findings indicate that mitochondrial spatiotemporal coupling and oscillatory behavior is influenced by substrate selection, perhaps through differing effects on ROS/redox balance. In particular, glucose-perfusion generates strong intermitochondrial coupling and temporal oscillatory stability. Pathological changes in specific catabolic pathways, which are known to occur during the progression of cardiovascular disease, could therefore contribute to altered sensitivity of the mitochondrial network to oxidative stress and emergent  $\Delta\Psi_m$  instability, ultimately scaling to produce organ level dysfunction.

## INTRODUCTION

Oscillatory behavior in mitochondria was reported more than 40 years ago and  $\Delta\Psi_m$  instability, ranging from localized flickers to synchronized mitochondrial network oscillations, has been observed in intact cells subjected to oxidative, ischemic, or metabolic stress by numerous investigators (for review, see Aon et al. (1)). In cardiac myocytes, the latticelike morphological organization of the mitochondrial network lends itself to complex spatiotemporal phenomena, including  $\Delta\Psi_m$  oscillations and waves (2), oscillations of individual (3,4) or clusters of mitochondria (5), and network-wide limit-cycle oscillations in cells (6–8) and tissues (9). Reactive oxygen species (ROS)-induced ROS release (10) among neighboring mitochondria, leading to self-organized synchronization of oscillators, is the leading mechanistic explanation for this type of intermitochondrial communication (5,11), although  $\text{Ca}^{2+}$ -dependent coupling might also occur during cellular  $\text{Ca}^{2+}$  overload (12). Pathophysiological conditions can render the mitochondrial

network hypersensitive to widespread  $\Delta\Psi_m$  collapse or self-organized oscillation, a state referred to as “mitochondrial criticality” (13,14). When such a threshold is crossed, mitochondrial oscillators organize into clusters that can span a subregion of the cell or the whole volume of the myocyte (15,16). Understanding how  $\Delta\Psi_m$  oscillations are organized in time and space is important because the magnitude of the effects of  $\Delta\Psi_m$  loss on cardiac electrophysiology (17,18), excitation-contraction coupling (16), and cell survival (19) increases as more and more of the network becomes depolarized, potentially scaling to whole organ dysfunction, for example, causing lethal arrhythmias or myocardial injury during ischemia reperfusion (17).

Mitochondrial synchronization phenomena (i.e.,  $\Delta\Psi_m$  waves or oscillations) have been demonstrated previously for mitochondria in myocytes of intact perfused hearts (20), where the cells are physically and electrically connected through gap junctions; however, it is not known whether the same spatiotemporal mitochondrial network properties apply. Additionally, little is known about the effects of different metabolic substrates on mitochondrial cluster frequency dynamics. The latter might be relevant

Submitted December 22, 2014, and accepted for publication January 13, 2015.

\*Correspondence: [aarmoundas@partners.org](mailto:aarmoundas@partners.org)

Editor: James Sneyd.

© 2015 by the Biophysical Society  
0006-3495/15/04/1922/12 \$2.00

<http://dx.doi.org/10.1016/j.bpj.2015.01.040>

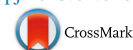

to the known changes in energy substrate utilization in heart failure (21) and diabetic cardiomyopathy (22).

To address these questions, we have developed wavelet-based analyses of  $\Delta\Psi_m$  (TMRE fluorescence) oscillations of individual mitochondria in cardiac myocytes under pathophysiological conditions, which can provide a dynamic frequency for each oscillating mitochondrion (23). This allows for detailed classification and analysis of the cluster organization of mitochondria with similar frequencies (7). For mitochondria belonging to the major frequency cluster, the overall cluster size was found to be inversely correlated with the cluster's mean frequency, suggesting that cluster synchronization to a common oscillatory mode takes longer for larger clusters due to diffusion-mediated processes within the coupling medium (7,24).

To quantify how coupling strength contributes to synchronization among mitochondrial oscillators, we take the analysis further by applying an extended Kuramoto-type model for weakly coupled oscillators to determine coupling constants of the network under different metabolic conditions. Recent studies have used this approach to explain how circadian networks are synchronized through intrinsic frequencies that drift in time (25,26). Most of these models describe phase dynamics through a sinusoidal phase coupling term with a time-independent coupling constant; however, for cardiac myocytes, the observed dynamic transitions in the organization of mitochondrial oscillations suggest that there is time-varying mitochondrial coupling as well, which we take into consideration in this study.

These methods are applied to determine whether mitochondrial oscillations in the intact heart are similar to those in isolated myocytes, and whether substrate selection differentially modulates the dynamics of mitochondrial oscillations.

## MATERIALS AND METHODS

### Experimental methods

All experiments have been conducted on intact guinea pig hearts or freshly isolated adult guinea pig ventricular myocytes according to previously described protocols (15,16,27) and in accordance with the Guide for the Care and Use of Laboratory Animals (No. 85-23, 1996, National Institutes of Health, Bethesda, MD) and The Johns Hopkins Animal Care and Use Committee (for more information, we refer to the [Supporting Material](#)).

#### Intact heart experiments

$\Delta\Psi_m$  imaging data (Fig. 1 A) corresponds to a retrogradely-perfused heart imaged using a laser scanning two-photon microscope, as described in detail in Slodzinski et al. (20). In brief, the cationic potentiometric fluorescent dye TMRE (tetramethylrhodamine ethyl ester) was used to monitor  $\Delta\Psi_m$  and images were recorded with a two-photon laser-scanning microscope (MRC-1024MP; Bio-Rad, Hercules, CA) with an excitation at 740 nm (Tsunami Ti:Sa laser; Spectra-Physics, Santa Clara, CA) and an emission band at  $605 \pm 45$  nm. Contractile motion was arrested by perfusion with Tyrode solution containing 20 mM BDM (butanedione monoxime) to suppress contraction (see Whole Heart Preparation in the [Supporting Material](#)), and single laser flashes were applied to the region marked by the yellow boxes in Figs. 1 A and S1 A in the [Supporting Material](#).

### Isolated cardiomyocyte experiments

Freshly isolated myocytes (Fig. 1 B) were loaded with 100 nM TMRE at 37°C in a thermostatically controlled flow chamber mounted on the stage of an upright epifluorescence microscope (BX61WI; Olympus, Waltham, MA). Their oscillatory behavior was assayed in the presence of different metabolic substrates. Myocytes were visualized with an objective 25×/1.05 W MP and images were acquired using a multiphoton-excited fluorescence Fluoview FV1000 MPE (Olympus) and a Deep Sea ultrafast system scanning laser (Mai Tai, Waltham, MA). Images were recorded with excitation at 740 nm and the red emission of TMRE collected at 605 nm using a 578–630 nm band-pass filter.

For imaging, myocytes were perfused with Tyrode solution (pH 7.5) containing 1 mM  $\text{Ca}^{2+}$  in the presence of 10 mM: glucose or pyruvate or lactate or  $\beta$ -hydroxybutyrate, as indicated. Oscillations were triggered with a localized ( $5 \times 5 \mu\text{m}$ ) laser flash, as previously described in Aon et al. (15).

### Selection and processing of individual mitochondrial TMRE signals

Epicardial images of the perfused heart were examined and cells showing mitochondrial  $\Delta\Psi_m$  oscillations, defined by a decrease of >10% in the whole cell TMRE fluorescence, were analyzed (Fig. 1 A). Myocyte borders along sarcolemma and intercalated disks were manually applied on a pixel-by-pixel basis and grid templates representing the minimal mitochondrial cluster size (typical 1–2 mitochondria per sarcomere), excluding the nuclear region, were constructed for each selected myocyte (Fig. 1 A).

Individual mitochondrial TMRE signals were extracted from stacks of recorded frames of an isolated myocyte by manually applying a grid template to heart myocytes on time-averaged stack images. Further spatiotemporal processing was done using wavelet analysis (7,23) (Fig. 1 C), as previously described in Kurz et al. (7,23). Selection of wavelet parameters, cutoff frequencies, normalization of mitochondrial TMRE signals, and determination of maximal wavelet power frequencies were carried out as described previously in Kurz et al. (7,23). (A more detailed description can be found in Selection and Processing of TMRE Fluorescence from Individual Mitochondria in Isolated Cardiac Myocytes in the [Supporting Material](#).)

### Computational model

To study mitochondrion-to-mitochondrion coupling within clustered and nonclustered mitochondria, we sought to develop a minimum-order model that employs two parameters to characterize coupling: a mitochondrion-to-mitochondrion coupling constant, and the intrinsic oscillatory frequency.

Identification of mitochondrial nearest neighbors was used as in Kurz et al. (7) to determine the mitochondrial network's structural morphology. To examine the network's connectivity properties, intermitochondrial coupling was only considered for local nearest-neighbor environments.

Wavelet phases were extracted from each individual mitochondrial TMRE (for more details, see Selection and Processing of TMRE Fluorescence from Individual Mitochondria in Isolated Cardiac Myocytes in the [Supporting Material](#).) Wavelet frequencies are nondifferentiable in time at points of frequency change (phase singularity), therefore, wavelet frequencies were taken as dynamical wavelet phase updates with the value of the actual wavelet frequency as the starting point. The resulting updated wavelet frequency was median-filtered to correct for frequency changes at phase singularities.

Within the stochastic coupling model of the mitochondrial network, mitochondrial intrinsic frequencies are modeled as Ornstein-Uhlenbeck frequencies that drift in time towards the respective measured mitochondrial frequency (26,28),

$$\frac{d\omega_m}{dt} = -\gamma(\omega_m - \mu_m) + \eta_m(t), \quad (1)$$

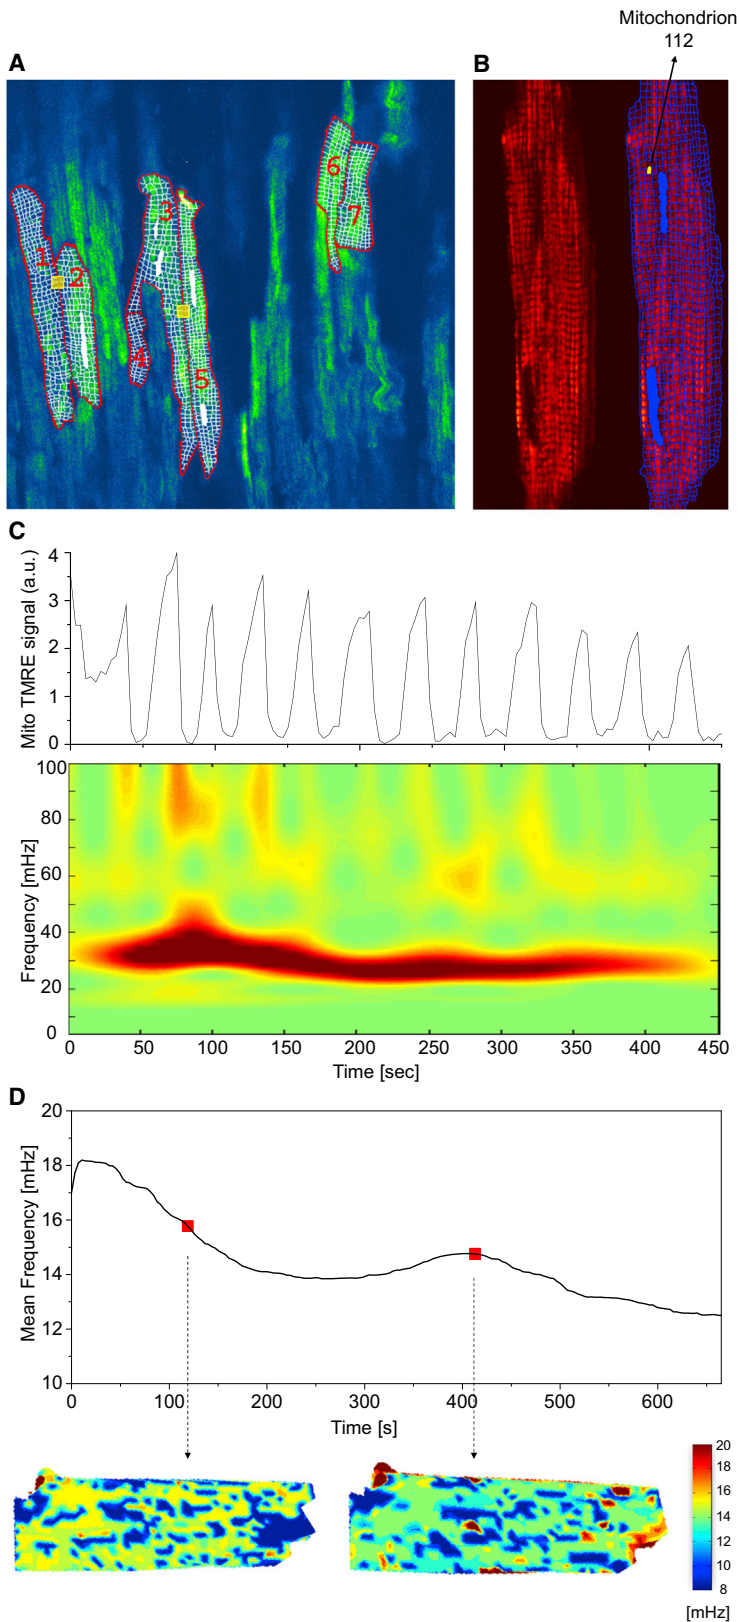

**FIGURE 1** Oscillating mitochondria in two-photon images of TMRE-fluorescent intact guinea-pig heart tissue and isolated cardiomyocytes. (A) Within the optical slice of the perfused heart, cardiac myocytes were selected according to observed depolarizations. Myocyte borders along the sarcolemma and intercalated disks as well as mitochondrial grids were manually applied on a pixel-by-pixel basis. (Yellow boxes) Laser-flashed regions of the myocytes. (B) Isolated cardiac myocyte (left side of panel) and the same myocyte with an overlaid grid to consider single mitochondria (right side of panel), e.g., mitochondrion 112 (mitochondrion 112 denotes the numerical identifier of the selected mitochondrion). (C) TMRE intensity time plot of mitochondrion 112 from (B) and the corresponding absolute squared wavelet transform (lower panel). Visibly, the mitochondrion oscillates between 20 and 40 mHz during the recording. (D) Frequency distribution maps obtained from a different cardiac myocyte. (Upper panel) Time evolution of the averaged frequency of all mitochondria. For two time-points (red dots), the mitochondrial frequency distribution is shown (lower panels): mitochondrial frequency values are put in the respective mitochondrial position and missing pixels are interpolated (see main text for details). The majority of mitochondria oscillate between 14 and 16 mHz. Some of them also have a highly correlated signal at the same  $t$ , thus constituting the major mitochondrial cluster at time  $t$  as used in the text.

where  $\mu_m$  represents the mean frequency towards which the intrinsic mitochondrial frequency is drifting,  $\eta_m$  is a Gaussian white noise source with variance  $\sigma_\eta^2 = 2\gamma\sigma_m^2$ ,  $\gamma$  represents the decay rate, and  $\sigma_m^2$  is the amplitude

of mitochondrial frequency fluctuations (25,26). The mean frequency  $\mu_m$  was chosen as the time-dependent wavelet frequency of the  $m$ -th mitochondrion, whereas the free constant  $\gamma$  was assumed to be identical for each

mitochondrion in the network. The frequency fluctuation amplitude measure,  $\sigma_m$ , for each mitochondrion, was taken as the standard deviation of the measured mitochondrial wavelet frequency. Discrete dynamical updates were performed to calculate the mitochondrial intrinsic frequencies (29).

Local mitochondrial coupling was considered to be of local mean field type, and local mean field parameters  $R_m(t)$  and  $\psi_m(t)$ , corresponding to mitochondrion  $m$ , are defined as

$$R_m(t)e^{2i\pi\psi_m(t)} = \frac{1}{|L_m|} \sum_{j \in L_m} e^{2i\pi\phi_j(t)}, \quad (2)$$

where  $L_m$  is the set of nearest neighbors of a mitochondrion (compare to Rougemont and Naef (25,26)) and  $|L_m|$  is the number of nearest neighbors. This corresponds to phase differential equations of the form

$$\frac{\partial \phi_m(t)}{\partial t} = \omega_m(t) + K_m(t)R_m(t)\sin(2\pi(\psi_m(t) - \phi_m(t))) \quad (3)$$

for each mitochondrion  $m$ .

Maximum likelihood estimation was applied to optimize the model parameter  $\gamma$  within the interval [0,1]. With the optimal decay rate parameter, the coupling constants  $K_m(t)$  were evaluated for 10 different starting points  $\omega_m(0)$  and 100 different dynamically evolving Ornstein-Uhlenbeck frequencies  $\omega_m$ , respectively, as above.

## Stochastic phase model

Because mitochondrial  $\Delta\Psi_m$  oscillations exhibit dynamically changing frequencies, we extended the Kuramoto model to include frequencies that can drift in time. This can be done by introducing a second timescale  $1/\gamma$ ,  $\gamma$  being a measure of the stability of the phase oscillator (26), to model frequency dynamics as Ornstein-Uhlenbeck processes (25,26).

In Ornstein-Uhlenbeck processes, the frequency dispersion  $\sigma_m$  is a measure of frequency noise whereas  $\gamma$  is a measure of the intrinsic frequency to adhere to a fixed frequency  $\mu_m$ , thus revealing the stability of the oscillator (compare to Lemons (29)). Variation of  $\gamma$  follows exponential dynamics: large  $\gamma$ -values yield intrinsic frequencies that are more dependent on the Gaussian white-noise term, and thus show a stronger drift than those with small  $\gamma$  (26,30).

In addition to dynamically changing intrinsic frequencies, phase coupling was assumed to underlie dynamical changes as well, to be unique for each mitochondrion and, for each mitochondrion and its nearest neighbors, to be of local mean field type (Fig. 2). Each mitochondrion's wavelet frequency was determined according to protocols established in 2010 (7,23) and each mitochondrion's frequency fluctuation amplitude  $\sigma_m$  was taken as the standard deviation of the measured mitochondrial wavelet frequency. Moreover, the mean frequency toward which the intrinsic frequencies drift in time was taken as the time-dependent mitochondrial wavelet frequency, thus leaving only the decay rate parameter  $\gamma$  fixed for all mitochondria in a cardiac myocyte.

## Statistics

The wavelet analysis fitting routines were obtained using the software MATLAB (Ver. 7.1.0.246, R14, The MathWorks, Natick, MA). Further statistics were performed using the software ORIGINPRO 8 (SR0 Ver. 8.0724, B724, OriginLab, Northampton, MA).

## RESULTS

### Frequency and cluster-size relationship in whole heart

To examine whether the individual mitochondrial TMRE signals in the intact heart exhibit dynamic properties similar

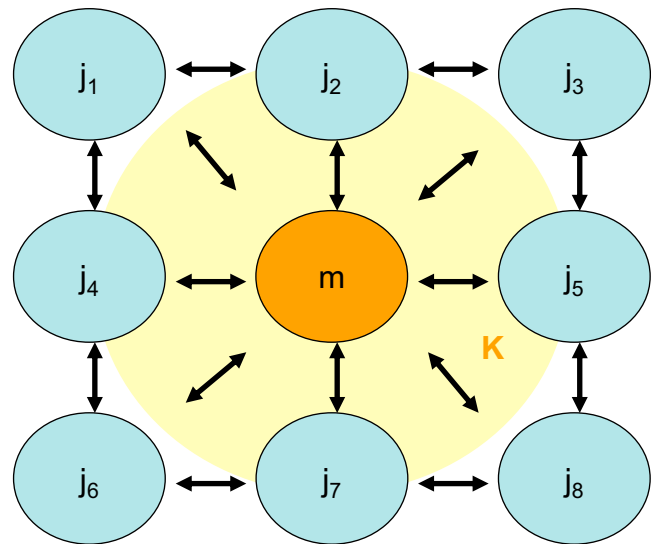

FIGURE 2 Schematic of local intermitochondrial coupling. In the stochastic phase model, intermitochondrial coupling was only considered for the local nearest-neighbor environment, thus providing an average coupling constant  $K$  for each mitochondrion (symbolized by the light-colored cloud). To see this figure in color, go online.

to those of isolated cardiac myocyte, the time course of mitochondrial fluorescence was extracted from a hand-drawn grid of recorded stack images averaged over time. Because the mitochondrial signal is nonstationary in time, wavelet transforms are an adequate time-frequency representation for temporal processing (31). This approach allowed us to filter all mitochondria with similar dynamical frequency behavior in order to identify mitochondrial frequency clusters and examine their spatial correlates (7). In brief, frequency histograms were obtained for each myocyte at every time-point  $t$  and the maximum peak of mitochondria with similar frequencies, i.e., mitochondria belonging to a (major) frequency cluster, was determined as the major cluster peak.

Subsequently, mitochondria belonging to peaks neighboring the major cluster peak were incorporated into the cluster if their signal at  $t$  was highly correlated to the cluster signal. More details can be found in Kurz et al. (7) and in Selection and Processing of TMRE Fluorescence from Individual Mitochondria in Isolated Cardiac Myocytes in the Supporting Material. In Fig. 1 D, the distribution of frequencies for a glucose-perfused isolated myocyte is exemplarily shown in a two-dimensional image at two specific time-points (lower panel; the lower cutoff frequency is 8.2 mHz). To achieve this, the values of mitochondrial frequencies were placed at the pixel-positions of the respective mitochondrion and missing intermitochondrial pixels were interpolated using the GRIDDATA function in the software MATLAB (Ver. 7.6.0.324, R2008a). For the first time-point, it can be seen that many mitochondria that are distributed all over the cell show similar frequencies between 14 and 16 mHz. They belong to the major cluster. Yet, the second



image at a later time-point shows a slightly different frequency distribution with most frequencies being located at  $\sim 14$  mHz. There is also a newly formed smaller pocket or cluster of mitochondria with frequencies  $>16$  mHz on the right-hand side of the myocyte, that does not necessarily belong to the major frequency cluster.

As in the case of isolated cardiac myocytes, major cluster mitochondria were found for each cardiac myocyte with signs of depolarization during TMRE recording of glucose-perfused hearts ( $N = 2$ ), close to the left anterior descending coronary artery. We observed that the inverse relationship between relative cluster area and number, as observed in isolated cardiac myocytes, could be confirmed (Fig. 3). Therefore, this indicates that large clusters have a longer oscillation period than small clusters, not only in the case of isolated myocytes, but also for connected cardiac myocytes in the intact heart. However, an inverse relationship between mean cluster radius and frequency could only be verified for one of the two whole heart preparations. The mean cluster radius is found to be in a range approximately one-half the size of that of isolated glucose-treated cardiac myocytes.

The rate of change of mean cluster radius with respect to the cluster frequency for glucose-treated myocytes in the intact heart preparation was  $-0.14 \pm 0.01 \mu\text{m}/\text{mHz}$  (Fig. 3 A, and see also Fig. S1 B). Summary statistics of mitochondrial frequency distributions of major cluster mitochondria for all cardiac myocytes of the respective whole heart yields frequency ranges of 10.30–58.1 mHz (Fig. 3 C). Evidently, the range of mitochondrial frequencies in intact heart myocytes is significantly broader than in isolated myocytes, i.e., mitochondria generally oscillate at

higher frequencies in the intact heart (see also Fig. S1 B). In Fig. 3 A, this leads to a mean cluster radius of  $\sim 11$ – $17 \mu\text{m}$  for this preparation.

The rate of change of % area versus frequency for cardiac myocytes was determined as  $-2.44 \pm 0.10 \%/ \text{mHz}$  (Fig. 3 B). Likewise, the % number of cluster mitochondria versus frequency gave a rate of change of  $-2.37 \pm 0.10 \%/ \text{mHz}$  (Fig. 3 D). Therefore, for recordings with glucose-perfusion, the respective rate of change of % area and number versus frequency in intact heart cardiac myocytes is  $\sim 18$ – $19\%$  smaller than in isolated cardiac myocytes. Also, the results point out that clusters at whole myocyte level in whole heart preparations have higher frequencies than those in isolated cardiac myocytes. Similar results have been achieved with another optical slice of the intact perfused heart (see Fig. S1, A and B).

### Frequency and cluster-size relationship in isolated myocytes

Having demonstrated that mitochondria in the isolated myocyte exhibit properties similar to those in the intact heart, we sought to examine the mitochondrial properties in cardiomyocytes challenged with different substrates.

Major cluster mitochondria were determined for myocytes treated with pyruvate,  $\beta$ -hydroxybutyrate, lactate, or glucose, respectively. Subsequently, the relative area of cluster mitochondria (quotient of total cluster pixel-count and myocyte pixel-count) was plotted against the mean frequency of the cluster (Fig. 4). Similarly, the relative number of cluster mitochondria (quotient of the number of cluster mitochondria versus the total number of mitochondria)

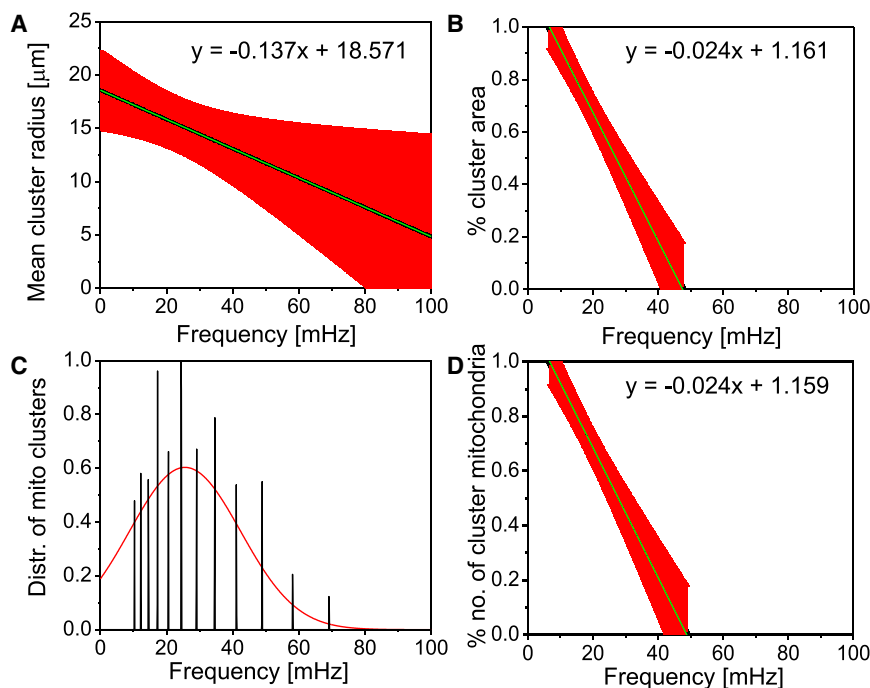

FIGURE 3 Mitochondrial major cluster properties of cardiac tissue of a guinea pig heart. Depicted are the results obtained from the analysis of seven myocytes for (A) mean cluster radius versus frequency; (B) cluster area normalized by the full myocyte area versus frequency; (C) distribution of mitochondrial frequencies for all cluster mitochondria across all myocytes; and (D) cluster mitochondria count normalized by the total number of mitochondria for the major cluster versus frequency. In the plots, we have (black) mean curve; (red) standard error bars. The apparent discrepancy between the frequency range in (A) and in (B)–(D) is due to interpolation errors in (A). A similar figure for another optical slice of perfused heart tissue can be found in Fig. S1. To see this figure in color, go online.

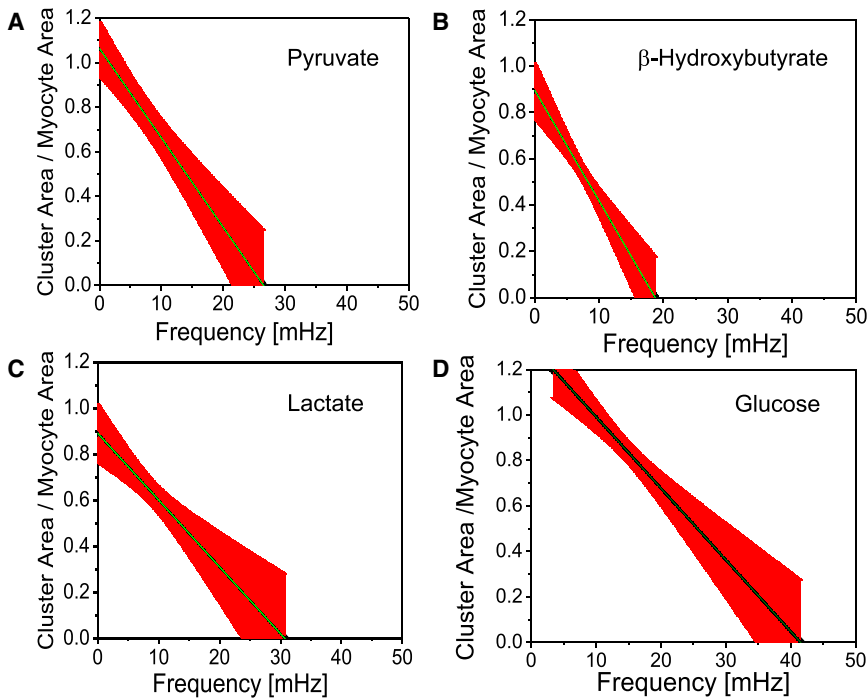

FIGURE 4 Mitochondrial cluster area normalized by the full myocyte area as a function of frequency. Results obtained for isolated cardiac myocytes perfused with Tyrode solution pH 7.5 containing 1 mM  $\text{Ca}^{2+}$  and 10 mM of pyruvate (A,  $n = 10$ ),  $\beta$ -hydroxybutyrate (B,  $n = 14$ ), lactate (C,  $n = 7$ ), or glucose (D,  $n = 9$ ). To see this figure in color, go online.

was plotted against the mean frequency (see Fig. S3). Also, measures for cluster size were compared with the mean frequency of the cluster mitochondria by relating the mean cluster radius (the distance of the geometrical center of the cluster to each single cluster mitochondrion's geometrical center averaged over all cluster mitochondria) and the mean frequency of the cluster (see Fig. S2). The inverse relationship among mean mitochondrial mean cluster radius, relative cluster area, and number is obvious and has already been shown for glucose-treated cardiac myocytes (7). This suggests that, throughout all sets of myocytes that are treated with respective substrates, large clusters have a longer oscillation period than small clusters.

Frequency distributions of mitochondria for each specific substrate group were determined as previously described in Kurz et al. (7) (see also Fig. S4). For glucose-treated myocytes, this gives a frequency bandwidth of 8.73–22.3 mHz. In comparison, pyruvate-treated myocytes show a more dispersed frequency distribution that ranges from 3.7 to 54.83 mHz, whereas myocytes from the lactate group are more narrowly distributed with frequencies in the range 3.9–15.0 mHz. Finally, myocytes that were treated with  $\beta$ -hydroxybutyrate mostly displayed major cluster oscillations in the low frequency range of 4.0–10.1 mHz.

The cluster size can be estimated more precisely by the % area of the cluster (quotient of the area of cluster mitochondria and whole myocyte area, Fig. 4). The rate of change of % area versus frequency for glucose-, pyruvate-, lactate-, and  $\beta$ -hydroxybutyrate-treated cardiac myocytes was given as  $-2.96 \pm 1.11$  %/mHz,  $-4.01 \pm 0.07$  %/mHz,  $-2.90 \pm 0.07$  %/mHz, and  $-4.86 \pm 0.07$  %/mHz, respec-

tively. Similar results were obtained for the % number of cluster mitochondria (see Frequency and Cluster-Size Relationship in Isolated Myocytes in the Supporting Material). It appears that cardiac myocytes from the  $\beta$ -hydroxybutyrate group show the strongest change of % area versus frequency, i.e., ~64% more than glucose-treated myocytes. Pyruvate-treated myocytes show a rate of change of % area versus frequency that is ~35% higher than myocytes from the glucose group. Cardiac myocytes from either the lactate or the glucose group exhibit similar rates of change of % area versus frequency. In addition, myocytes from the  $\beta$ -hydroxybutyrate group show % area versus frequency changes at moderately low frequencies of <20 mHz unlike the other substrates that exhibit % area changes at slightly higher frequencies, especially in glucose-treated cardiomyocytes. Interestingly, the two substrates leading to the most reduced redox potential, pyruvate and  $\beta$ -hydroxybutyrate, have a higher % area of the cluster. Generally, a more rapid drop in % cluster area in nonglucose substrates indicates smaller clusters and lower frequencies as compared with glucose. This is the picture of a more fragmented population of oscillators in smaller clusters, a conclusion reinforced by the higher frequency dispersion exhibited by the oscillators (Fig. S4).

### Cluster oscillation coherence

There is no significant change in the coherence of the cluster mitochondria during the recording across substrate groups, thus indicating high temporal stability of the respective oscillating cluster mitochondria (see Fig. S5). However, coherence of cluster mitochondria averaged in time were

highest in glucose-treated cardiac myocytes at  $0.66 \pm 0.04$ , whereas coherence values in the pyruvate-, lactate-, and  $\beta$ -hydroxybutyrate-treated substrate groups were  $0.40 \pm 0.03$ ,  $0.49 \pm 0.04$ , and  $0.49 \pm 0.03$ , respectively. The coherence values between mitochondria that do not belong to the major cluster were determined to be  $0.44 \pm 0.04$ ,  $0.39 \pm 0.04$ ,  $0.46 \pm 0.04$ , and  $0.39 \pm 0.03$  for glucose-, pyruvate-, lactate-, and  $\beta$ -hydroxybutyrate-treated cardiac myocytes, respectively. Thus, noncluster mitochondria coherence properties were similar for different substrates, exhibiting a relatively high degree of coherence. As suggested in Kurz et al. (7), this may be due to stable oscillations of noncluster mitochondria at frequencies that are different from the frequencies at which major cluster mitochondria oscillate.

The difference in coherence between cluster and noncluster mitochondria for glucose-treated myocytes (7) remains valid for all substrate groups, although it is less pronounced in lactate and pyruvate. This might be due to a decreased level of mitochondrial nearest-neighbor coupling during each depolarization/repolarization. Specifically, in pyruvate-treated cardiomyocytes, smaller and more topologically dispersed ensembles of major cluster mitochondria were observed. This increases the number of mitochondria within the major cluster that have at least one noncluster nearest-neighbor mitochondrion. Also, the number of noncluster nearest neighbors for the majority of individual cluster mitochondria is increased, thus, taken together, providing a lower averaged temporal coherence between a cluster mitochondrion and its nearest neighbors.

### Forward model and model validation

To study mitochondrion-to-mitochondrion coupling between cluster and noncluster mitochondria, we sought to develop a minimum-order model that employs two parameters to characterize the coupling: a mitochondrion-to-mitochondrion coupling constant and the intrinsic mitochondrial oscillatory frequency. Such a quantification of intermitochondrial coupling may serve to identify hubs of highly connected mitochondria within ventricular myocytes and thus may contribute to further examine synchronization properties of the mitochondrial network. In addition, individual mitochondrial coupling constants can be used to stochastically simulate large mitochondrial networks and identify possible threshold parameters that may characterize the cell's descent towards death.

Forward modeling for whole-cell intensity signals with myocyte-specific optimal decay parameter  $\gamma$  and mitochondrial coupling constants was performed by cross-correlating the cosine of the whole-cell TMRE signal wavelet phase with the sum of cosines of the forward-modeled phases of the stochastic model (Figs. S8 and S9).

High correlation coefficients indicate the similarity of predicted signals and the recorded signals, providing valid-

ity for the acquired coupling constants. Correlation coefficients for each cardiac myocyte were determined to be  $0.88 \pm 0.02$ ,  $0.64 \pm 0.05$ ,  $0.85 \pm 0.03$ , and  $0.75 \pm 0.03$  for glucose-, pyruvate-, lactate-, and  $\beta$ -hydroxybutyrate-treated myocytes, respectively (Fig. S9).

### Spatiotemporal properties of local coupling in mitochondrial frequency clusters

Time-dependent coupling constants for each mitochondrion in all cardiac myocytes across different substrate groups were determined using the respective optimal decay rate parameters. For each of the substrate-treated myocyte groups, mean decay rate parameters were determined to be  $7.13 \times 10^{-2} \pm 1.55 \times 10^{-2} \text{ s}^{-1}$  and  $6.46 \times 10^{-2} \pm 1.14 \times 10^{-2} \text{ s}^{-1}$  for glucose and  $\beta$ -hydroxybutyrate, respectively, whereas pyruvate and lactate showed slightly smaller decay rate parameters ( $6.10 \times 10^{-2} \pm 1.26 \times 10^{-2} \text{ s}^{-1}$  and  $6.29 \times 10^{-2} \pm 1.17 \times 10^{-2} \text{ s}^{-1}$ , respectively (Fig. S7)).

Cluster and noncluster mitochondria for each myocyte were determined as detailed above and, for each recorded point in time, coupling constants were averaged for cluster and noncluster mitochondria, to evaluate the time evolution of their respective coupling constants (Fig. 5).

To compare myocytes with unequal recording time, we set each myocyte's duration of oscillations to 1. One observes higher coupling strengths for cluster mitochondria in cardiac myocytes perfused with glucose or  $\beta$ -hydroxybutyrate, whereas differences in averaged coupling constants for cluster and noncluster mitochondria in pyruvate or lactate are less pronounced. One can also notice a distinct decrease of cluster coupling constants at the beginning of the recordings for pyruvate- and glucose-perfused myocytes. This might be due to a strong drift from cluster frequencies towards the common cluster frequency for those cluster mitochondria whose frequencies are the farthest away from the common cluster frequency according to Eq. 3 (or Eq. S3 in the Supporting Material).

Averaging in time yields a mean coupling constant of  $7.78 \times 10^{-2} \pm 0.98 \times 10^{-2} \text{ s}^{-1}$  for cluster and  $4.40 \times 10^{-2} \pm 0.64 \times 10^{-2} \text{ s}^{-1}$  for noncluster mitochondria, respectively, in glucose-perfused isolated cardiac myocytes. Pyruvate perfusion gave a similar time-averaged mean coupling constant for cluster mitochondria ( $7.49 \times 10^{-2} \pm 1.65 \times 10^{-2} \text{ s}^{-1}$ ) whereas lactate and  $\beta$ -hydroxybutyrate were found to have lower time-averaged cluster coupling constants ( $4.83 \times 10^{-2} \pm 1.25 \times 10^{-2} \text{ s}^{-1}$  and  $4.11 \times 10^{-2} \pm 0.62 \times 10^{-2} \text{ s}^{-1}$ , respectively). However, averaged coupling constants for noncluster mitochondria gave  $6.56 \times 10^{-2} \pm 1.60 \times 10^{-2} \text{ s}^{-1}$ ,  $4.24 \times 10^{-2} \pm 1.10 \times 10^{-2} \text{ s}^{-1}$ , and  $2.49 \times 10^{-2} \pm 0.34 \times 10^{-2} \text{ s}^{-1}$  for pyruvate, lactate, and  $\beta$ -hydroxybutyrate, respectively. Distributions of coupling constants were compared across substrates for cluster and noncluster mitochondria, respectively, and found to be significantly different from each other ( $p < 0.006$ ). In

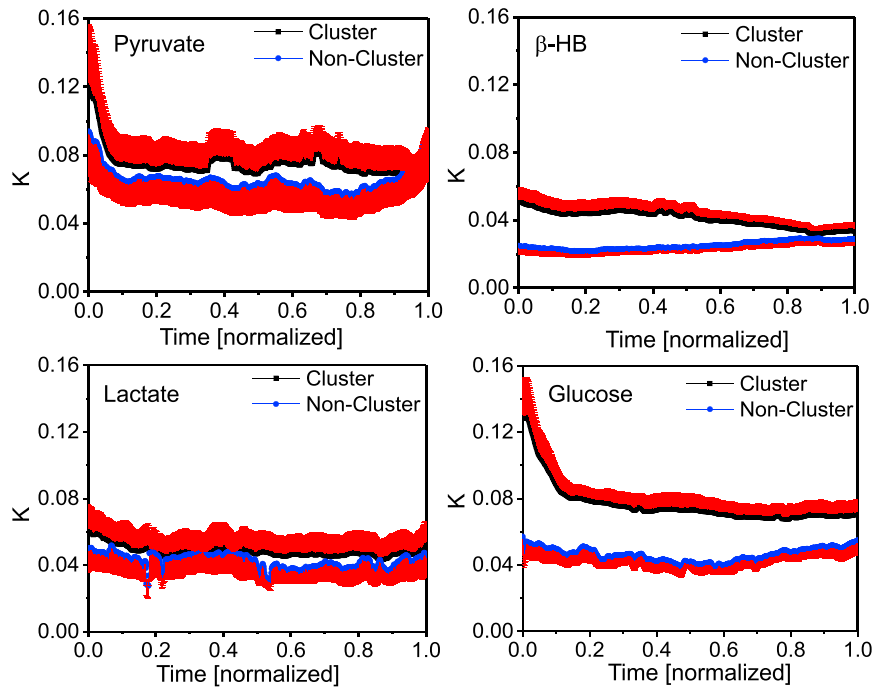

FIGURE 5 Mean mitochondrial cluster coupling constants (in units  $[s^{-1}]$ ) versus mean noncluster coupling constants for each point in time for cardiac myocytes perfused with pyruvate,  $\beta$ -hydroxybutyrate, lactate, or glucose. To allow statistical comparison among myocytes with unequal recording time, the duration of the oscillations of each recording was normalized. For pyruvate and lactate, lower ratios of averaged coupling constants for cluster to noncluster mitochondria suggest similar spatiotemporal contiguity properties of the mitochondrial clusters. This contiguity might underlie different metabolic control mechanisms as compared to glucose or  $\beta$ -hydroxybutyrate (compare to Fig. S5). Also, the higher values of cluster coupling constants obtained with pyruvate or glucose might be attributed to larger cluster areas as suggested by Fig. 4.

accordance with Fig. 4, lower mitochondrial cluster coupling can be attributed to smaller cluster areas for cell perfusion with  $\beta$ -hydroxybutyrate and lactate. For pyruvate and lactate, lower coupling constants for cluster compared to noncluster mitochondria suggest similar spatiotemporal contiguity properties of the mitochondrial clusters. This contiguity might underlie other metabolic control mechanisms, as in glucose or  $\beta$ -hydroxybutyrate.

However, cluster coherence in  $\beta$ -hydroxybutyrate-perfused cells is higher than for pyruvate (see Fig. S5). In Fig. 6, the mean cluster coupling constant for each myocyte was plotted against its corresponding mean cluster coherence value, across all substrates. One observes that glucose-perfused clusters exhibit an increase in cluster coupling for higher cluster coherence, the rate of change being  $0.32 \pm 0.03 s^{-1}$ . The same relation, but to a lesser degree and in line with decreasing cluster size (see Fig. 4), can be observed for  $\beta$ -hydroxybutyrate and pyruvate perfusion. Here, rates of change of cluster coupling versus cluster coherence are  $0.09 \pm 0.01 s^{-1}$  and  $0.08 \pm 0.03 s^{-1}$  for  $\beta$ -hydroxybutyrate and pyruvate, respectively. However, for pyruvate-perfused myocytes, some outliers are noticeable that can be attributed to the early decrease of coupling strength (Fig. 5). For pyruvate perfusion, coherence levels at this point are low, i.e., mitochondria might rapidly drop in and out of the cluster whereas glucose perfusion features the same distinct decrease of early coupling strength for high coherence levels. Generally, larger cluster areas show stronger cluster coupling constants, resulting in more coherent cluster oscillations. Yet for small cluster areas, as in the case of lactate-perfusion, cluster coupling does not in-

crease with cluster coherence: the rate of change is in this case  $-0.01 \pm 0.01 s^{-1}$ . Therefore, even though a smaller amount of cluster mitochondria might be more coherent, cluster coupling does not necessarily increase as well, indicating a greater influence of spatial than temporal coupling on mitochondrial networks.

## DISCUSSION

To our knowledge, this study is the first to quantitatively characterize the effects of different substrates on spatiotemporal

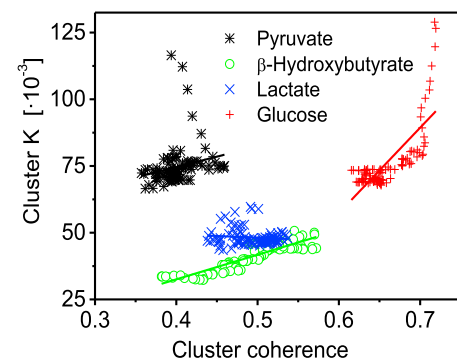

FIGURE 6 Mean mitochondrial cluster coupling constant  $K$  versus mean cluster coherence. For pyruvate-,  $\beta$ -hydroxybutyrate-, and glucose-perfused myocytes, higher cluster coupling values increase with higher cluster coherence values. However, the rate of increase lessens with the size of cluster area (see Fig. 4). For small cluster areas as in the case of lactate-perfused myocytes, cluster coupling does not increase with cluster coherence. Linear fit curves are displayed in their corresponding substrate colors. To see this figure in color, go online.



organization of stress-induced mitochondrial oscillations in the pathophysiological regime. To our knowledge, we have made several novel advances by this study. First, the wavelet-based method demonstrates that mitochondria in the intact heart exhibit properties similar to those in isolated myocytes, thus establishing the isolated myocyte as a reliable model for studying time-dependent frequency modulation of oscillating mitochondria, as well as mitochondrion-to-mitochondrion coupling. Second, different cluster organization properties in response to metabolic status are uncovered, therefore indicating different spatiotemporal properties of the mitochondrial network. Third, a stochastic phase model was introduced that provides a measure of the stability of mitochondrial phase oscillators by quantifying intermitochondrial coupling through a locally defined coupling constant for each individual mitochondrion. Fourth, the phase model reveals significant correlations among intermitochondrial coupling, mitochondrial cluster area, and cluster coherence.

Stress-induced mitochondrial  $\Delta\Psi_m$  oscillations have previously been shown to occur not only in isolated cardiac myocytes but also for intact hearts (20). These findings extend prior results obtained in single cardiac myocytes (13,15) and computational models (5,32) to the whole heart. Here, we show that mitochondrial collective behavior for clusters of mitochondria with similar frequencies seems to be analogous to that in isolated cardiomyocytes. This could be an indication that metabolic, molecular, and electrical communication via gap junctions between cardiac myocytes does not significantly modify mitochondrial network dynamics under stress. Interestingly, we observed depolarizations within myocytes of the intact heart to be partly spontaneous in some cardiac myocytes after laser-flashing of neighboring myocytes, thus indicating relay properties for mitochondrial coupling agents at intercellular junctions, similar to earlier findings in isolated myocyte pairs (2).

### Substrate dependence of mitochondrial network dynamics

Animal models of heart failure show increased myocardial glucose dependence and utilization, compared to fatty acids in the normal heart (21,33). However, the role of glucose in either aiding the myocyte to adapt to increased ATP demand or as a metabolic maladaptive response (while flexibility in substrate utilization remains limited), is still unclear (34,35). Furthermore, the data concerning the energetic substrate switch in human heart failure remain inconsistent (21). The main question behind possible substrate dependence of the mitochondrial network is whether glucose keeps higher synchronicity across the network as compared with other substrates. As shown, glucose-perfused cardiac myocytes demonstrate larger percentiles of cluster area versus myocyte area than other energy suppliers (compare to Fig. 4) whereas cardiac myocytes perfused with  $\beta$ -hy-

droxybutyrate demonstrated the strongest change in % cluster size versus mean cluster frequency. Also, mitochondrial frequencies were found to be within a narrower low-frequency range in glucose than in the other substrates (Fig. S4). Dispersion in cluster size and frequencies may indicate heterogeneity and less synchrony. Dynamic mitochondrial clusters would form more rapidly during ROS-induced ROS release by recruiting other mitochondrial oscillators, which in turn would leave fewer clusters with different frequencies, thus narrowing the mitochondrial frequency distribution. This finding relates to the problem of synchronization: higher slope and larger frequency distribution represent a signature of desynchronization due to dynamic heterogeneity.

The model presented herein attributes this fundamental feature to time-dependent drifting frequencies of the oscillators. Mechanistically, time-dependent drifting frequencies can be explained by local dynamics of ROS production and ROS scavenging systems involving mitochondrial matrix and the extramitochondrial compartment (36). Interestingly, the two substrates leading to the most reduced redox potential, pyruvate and  $\beta$ -hydroxybutyrate, have higher % area of the cluster than lactate.  $\beta$ -hydroxybutyrate-perfused cardiac myocytes still show lower cluster coupling than cells with pyruvate or glucose perfusion. Metabolically, the major difference between pyruvate and lactate is that cytosolic redox status is bestowed with less (pyruvate) or more (lactate) reducing equivalents available, although both would likely lead to more reduced matrix NADH than in glucose, feeding NADH oxidase. This would concur with an increase in ROS levels and hence higher intermitochondrial coupling rates. Mean coupling for lactate and pyruvate is lower than for glucose, thus indicating more complex redox relations or spatiotemporal coupling properties, as discussed below. However, additional studies will be required to determine the exact role of ROS in substrate-dependent redox processes.

### Modeling of large-scale synchronization in mitochondrial dynamics

The concept of scale-free mitochondrial networks has been introduced over the last decade to describe intermitochondrial coupling across different spatiotemporal domains in cardiac myocytes (6,27,37). Recent work extends these findings to mitochondrial networks from other organs such as salivary glands in live animals (9). Using intravital two-photon microscopy, these authors showed ROS-dependent cell- and tissue-wide synchronized mitochondrial oscillations under basal conditions. Weak temporal organization under physiological conditions is strengthened in the pathophysiological regime where the mitochondrial oscillators mostly lock-in low frequency and large amplitude oscillations (17,27). In this regard, cardiac mitochondria, like yeast, have been proposed to possess inherent

characteristics of a biological clock (37,38). Mathematical descriptions of the transition of such multiple oscillator networks to synchrony have been addressed by several authors (39,40). These studies show that coupling starts in a synchronized nucleus of excited oscillators that can then recruit new oscillators until a critical mass of oscillators induces spontaneous self-synchronization across the network (27,40).

The introduction of time-drifting frequencies to model circadian network behavior as an extended Kuramoto model with intrinsic Ornstein-Uhlenbeck frequencies (25,26) closely applies to mitochondrial frequency dynamics. This is because, in cardiac myocytes, mitochondrial phase dynamics are subject to time-dependent diffusion-mediated intermitochondrial coupling processes involving ROS production and consumption of antioxidant reserves (6,27). Because ROS scavenging in the cytoplasm restricts the long-range diffusion of the primary coupling agent, signaling of the oscillatory behavior is locally restricted, hence, there is an inherent frequency stiffness towards the actual mitochondrial frequency for each individual mitochondrial oscillator. The proposed model, however, does not consider randomly excitable mitochondria that might suddenly start oscillating or flickering during the course of recording (see, for example, Nivala et al. (11)). This will have an effect on myocytes where the major cluster only constitutes a minority of the network mitochondria as in the case of cardiac myocytes perfused with pyruvate or lactate (see below). However, we show that varying coupling strength has a similar effect on the cluster frequency behavior for all considered myocytes (see Fig. S11), an effect that is in agreement with Chiang et al. (41), where it is shown that a control of the common frequency of a network can be achieved by changing the strength of coupling between its constituents.

Frequency drifts are governed by the value of the decay rate parameter  $\gamma$  at a fixed frequency dispersion of the mitochondrial network; the collective response groups are locked into distinct and incoherent clusters whose formation depends on the proximity of individual frequencies to each other (25). On the other hand, large decay rate parameters decrease the frequency distribution and contribute to equalization of dynamic cluster properties (25,26). Therefore, our results for the decay rate parameter  $\gamma$  indicate that cardiac myocytes perfused with substrates like pyruvate and lactate, which possess slightly smaller  $\gamma$  than glucose or  $\beta$ -hydroxybutyrate, show a greater variety of frequency-locked clusters to some extent. Even though the differences are not significant, this would be consistent with the notion of similar temporal coherence properties of the major frequency cluster and noncluster mitochondria for pyruvate and lactate, and also with spatiotemporal cluster properties that are derived from the relation of % cluster area and mean cluster frequency (see also the Supporting Material).

Mitochondrial ROS-induced ROS release adds to basal ROS concentrations and significantly increases local ROS density for small areas of highly contiguous phase-locked mitochondrial oscillators (42). Because growing clusters lose contiguity and their mean frequency decreases (Figs. 3 and 4), the frequency of local ROS release declines along with ROS levels in nearest-neighbor environments, thus decreasing intermitochondrial coupling (Fig. S10). However, formation of cell-wide spanning clusters (13,27) slightly increases the overall basal ROS concentration, therefore increasing local intermitochondrial coupling as well.

Our results suggest that the correlation between local mitochondrial coupling and mitochondrial cluster frequency is mainly driven by early cluster formation where the averaged coupling constant is mildly ( $\beta$ -hydroxybutyrate and lactate) to strongly (glucose and pyruvate) higher (compare to Fig. 5) than for the rest of the recording. On the other hand, local coupling and % cluster area are mostly determined through low coupling constants at the end of the recordings where most mitochondria have been integrated into the spanning cluster, and cytoplasmic ROS levels increase with % cluster area. Generally, larger cluster areas show stronger intermitochondrial coupling, even though cluster coherence might be low (as in the case of pyruvate). The cluster area is largest when myocytes are perfused with glucose and therefore shows the largest averaged cluster coupling and largest increase in coupling strength for increasing cluster coherence. In addition, because an increase in mitochondrial cluster frequency leads to stronger cluster coupling for all substrates (see Fig. S11), and cluster areas in lactate-perfused cells are smaller than for all other examined substrates, these findings indicate that spatial coupling has a greater effect on synchronized mitochondrial networks than temporal coupling.

Coupling agent ROS in the normal heart is involved in the regulation of homeostatic and stress response pathways (43) and it has been shown that ROS levels and activity are increased under pathological conditions such as ischemia-reperfusion injury (44) and diabetic cardiomyopathy (22,45). The above results suggest that there is a decrease in intermitochondrial coupling under certain metabolic conditions such as preferred supply of substrates like lactate as opposed to glucose. Such reduced redox-based coupling in mitochondrial networks might impair cardiac energy utilization and may therefore exacerbate heart failure (compare to Ventura-Clapier et al. (46)).

## CONCLUSIONS

In conclusion, for ventricular cardiac myocytes within the pathophysiological regime of stress-induced synchronized  $\Delta\Psi_m$  oscillations, this study shows that % cluster area is inversely correlated with cluster mean frequency not only for isolated myocytes perfused with different energy suppliers but also for connected myocytes in the intact heart.

The results therefore underline the universality of this correlation that reflects the importance of spatial and temporal organization on network functionality. Also, the study quantifies intermitochondrial coupling by introducing a stochastic phase model that accurately describes mitochondrial network dynamics, and provides insights into changes in mitochondrial network functional topology under different metabolic conditions. Specifically, it is shown that glucose perfusion, in particular, has strong effects on the mitochondrial oscillatory network, generating high intermitochondrial coupling and coherence, and that spatial intermitochondrial coupling is preferred over temporal coupling.

## SUPPORTING MATERIAL

Supporting Materials and Methods, 11 figures, and two tables are available at [http://www.biophysj.org/biophysj/supplemental/S0006-3495\(15\)00179-4](http://www.biophysj.org/biophysj/supplemental/S0006-3495(15)00179-4).

## AUTHOR CONTRIBUTIONS

F.T.K. and A.A.A. designed research; F.T.K., M.A.A., and B.O'R. performed research; F.T.K. contributed analytic tools; F.T.K. and T.D. analyzed data; and F.T.K., M.A.A., B.O'R., and A.A.A. wrote the article.

## ACKNOWLEDGMENTS

The work was supported by a Boehringer Ingelheim Fonds fellowship given to F.T.K.

## SUPPORTING CITATIONS

References (47–53) appear in the [Supporting Material](#).

## REFERENCES

- Aon, M. A., S. Cortassa, and B. O'Rourke. 2008. Mitochondrial oscillations in physiology and pathophysiology. *Adv. Exp. Med. Biol.* 641:98–117.
- Romashko, D. N., E. Marban, and B. O'Rourke. 1998. Subcellular metabolic transients and mitochondrial redox waves in heart cells. *Proc. Natl. Acad. Sci. USA.* 95:1618–1623.
- Loew, L. M., R. A. Tuft, ..., F. S. Fay. 1993. Imaging in five dimensions: time-dependent membrane potentials in individual mitochondria. *Biophys. J.* 65:2396–2407.
- Siemens, A., R. Walter, ..., M. W. Berns. 1982. Laser-stimulated fluorescence of submicrometer regions within single mitochondria of rhodamine-treated myocardial cells in culture. *Proc. Natl. Acad. Sci. USA.* 79:466–470.
- Zhou, L., M. A. Aon, ..., B. O'Rourke. 2010. A reaction-diffusion model of ROS-induced ROS release in a mitochondrial network. *PLoS Comput. Biol.* 6:e1000657.
- Aon, M. A., S. Cortassa, and D. Lloyd. 2011. Encyclopedia of Molecular Cell Biology and Molecular Medicine. Wiley, Weinheim, Germany.
- Kurz, F. T., M. A. Aon, ..., A. A. Armoundas. 2010. Spatio-temporal oscillations of individual mitochondria in cardiac myocytes reveal modulation of synchronized mitochondrial clusters. *Proc. Natl. Acad. Sci. USA.* 107:14315–14320.
- Barabási, A. L., and Z. N. Oltvai. 2004. Network biology: understanding the cell's functional organization. *Nat. Rev. Genet.* 5:101–113.
- Porat-Shliom, N., Y. Chen, ..., R. Weigert. 2014. In vivo tissue-wide synchronization of mitochondrial metabolic oscillations. *Cell Rep.* 9:514–521.
- Zorov, D. B., M. Juhaszova, and S. J. Sollott. 2006. Mitochondrial ROS-induced ROS release: an update and review. *Biochim. Biophys. Acta.* 1757:509–517.
- Nivala, M., P. Korge, ..., Z. Qu. 2011. Linking flickering to waves and whole-cell oscillations in a mitochondrial network model. *Biophys. J.* 101:2102–2111.
- Ichas, F., L. S. Jouaville, and J. P. Mazat. 1997. Mitochondria are excitable organelles capable of generating and conveying electrical and calcium signals. *Cell.* 89:1145–1153.
- Aon, M. A., S. Cortassa, and B. O'Rourke. 2004. Percolation and criticality in a mitochondrial network. *Proc. Natl. Acad. Sci. USA.* 101:4447–4452.
- Aon, M. A., S. Cortassa, ..., B. O'Rourke. 2006. Mitochondrial criticality: a new concept at the turning point of life or death. *Biochim. Biophys. Acta.* 1762:232–240.
- Aon, M. A., S. Cortassa, ..., B. O'Rourke. 2003. Synchronized whole cell oscillations in mitochondrial metabolism triggered by a local release of reactive oxygen species in cardiac myocytes. *J. Biol. Chem.* 278:44735–44744.
- O'Rourke, B., B. M. Ramza, and E. Marban. 1994. Oscillations of membrane current and excitability driven by metabolic oscillations in heart cells. *Science.* 265:962–966.
- Akar, F. G., M. A. Aon, ..., B. O'Rourke. 2005. The mitochondrial origin of postischemic arrhythmias. *J. Clin. Invest.* 115:3527–3535.
- Aon, M. A., S. Cortassa, ..., B. O'Rourke. 2009. From mitochondrial dynamics to arrhythmias. *Int. J. Biochem. Cell Biol.* 41:1940–1948.
- Lloyd, D., S. Cortassa, and M. A. Aon. 2012. What yeast and cardiomyocytes share: ultradian oscillatory redox mechanisms of cellular coherence and survival. *Integr. Biol. (Camb).* 4:65–74.
- Slodzinski, M. K., M. A. Aon, and B. O'Rourke. 2008. Glutathione oxidation as a trigger of mitochondrial depolarization and oscillation in intact hearts. *J. Mol. Cell. Cardiol.* 45:650–660.
- Stanley, W. C., F. A. Recchia, and G. D. Lopaschuk. 2005. Myocardial substrate metabolism in the normal and failing heart. *Physiol. Rev.* 85:1093–1129.
- Tocchetti, C. G., V. Caceres, ..., M. A. Aon. 2012. GSH or palmitate preserves mitochondrial energetic/redox balance, preventing mechanical dysfunction in metabolically challenged myocytes/hearts from type 2 diabetic mice. *Diabetes.* 61:3094–3105.
- Kurz, F. T., M. A. Aon, ..., A. A. Armoundas. 2010. Wavelet analysis reveals heterogeneous time-dependent oscillations of individual mitochondria. *Am. J. Physiol. Heart Circ. Physiol.* 299:H1736–H1740.
- Li, P., and Z. Yi. 2008. Synchronization of Kuramoto oscillators in random complex networks. *Phys. A.* 387:1669–1674.
- Rougemont, J., and F. Naef. 2006. Collective synchronization in populations of globally coupled phase oscillators with drifting frequencies. *Phys. Rev. E Stat. Nonlin. Soft Matter Phys.* 73:011104.
- Rougemont, J., and F. Naef. 2007. Dynamical signatures of cellular fluctuations and oscillator stability in peripheral circadian clocks. *Mol. Syst. Biol.* 3:93.
- Aon, M. A., S. Cortassa, and B. O'Rourke. 2006. The fundamental organization of cardiac mitochondria as a network of coupled oscillators. *Biophys. J.* 91:4317–4327.
- Garcia-Ojalvo, J., M. B. Elowitz, and S. H. Strogatz. 2004. Modeling a synthetic multicellular clock: repressilators coupled by quorum sensing. *Proc. Natl. Acad. Sci. USA.* 101:10955–10960.
- Lemons, D. 2002. An Introduction to Stochastic Processes in Physics. The Johns Hopkins University Press, Baltimore, MD.
- Mihalcescu, I., W. Hsing, and S. Leibler. 2004. Resilient circadian oscillator revealed in individual cyanobacteria. *Nature.* 430:81–85.

31. Grossmann, A., J. Morlet, and T. Paul. 1985. Transforms associated to square integrable group representations. I. General results. *J. Math. Phys.* 26:2473–2479.
32. Cortassa, S., M. A. Aon, ..., B. O'Rourke. 2004. A mitochondrial oscillator dependent on reactive oxygen species. *Biophys. J.* 87:2060–2073.
33. Sack, M. N., and D. P. Kelly. 1998. The energy substrate switch during development of heart failure: gene regulatory mechanisms (Review). *Int. J. Mol. Med.* 1:17–24.
34. Funada, J., T. R. Betts, ..., F. Karpe. 2009. Substrate utilization by the failing human heart by direct quantification using arterio-venous blood sampling. *PLoS ONE.* 4:e7533.
35. Taegtmeier, H., L. Golfman, ..., M. van Arsdall. 2004. Linking gene expression to function: metabolic flexibility in the normal and diseased heart. *Ann. NY Acad. Sci.* 1015:202–213.
36. Kembro, J. M., M. A. Aon, ..., S. Cortassa. 2013. Integrating mitochondrial energetics, redox and ROS metabolic networks: a two-compartment model. *Biophys. J.* 104:332–343.
37. Aon, M. A., M. R. Roussel, ..., D. Lloyd. 2008. The scale-free dynamics of eukaryotic cells. *PLoS ONE.* 3:e3624.
38. Aon, M. A., S. Cortassa, and B. O'Rourke. 2008. Is There a Mitochondrial Clock?. Springer, New York.
39. Strogatz, S. 2000. From Kuramoto to Crawford: exploring the onset of synchronization in population of coupled oscillators. *Phys. D.* 143:1–20.
40. Strogatz, S. 2003. The Emerging Science of Spontaneous Order. Springer, New York.
41. Chiang, W. Y., P. Y. Lai, and C. K. Chan. 2011. Frequency enhancement in coupled noisy excitable elements. *Phys. Rev. Lett.* 106:254102.
42. Murphy, M. P. 2009. How mitochondria produce reactive oxygen species. *Biochem. J.* 417:1–13.
43. Burgoyne, J. R., H. Mongue-Din, ..., A. M. Shah. 2012. Redox signaling in cardiac physiology and pathology. *Circ. Res.* 111:1091–1106.
44. Heymes, C., J. K. Bendall, ..., A. M. Shah. 2003. Increased myocardial NADPH oxidase activity in human heart failure. *J. Am. Coll. Cardiol.* 41:2164–2171.
45. Bhatt, N. M., M. A. Aon, ..., S. Cortassa. 2014. Restoring redox balance enhances contractility in heart trabeculae from type 2 diabetic rats exposed to high glucose. *Am. J. Physiol. Heart Circ. Physiol.* 308:H291–H302.
46. Ventura-Clapier, R., A. Garnier, and V. Veksler. 2004. Energy metabolism in heart failure. *J. Physiol.* 555:1–13.
47. Backx, P. H., W. D. Gao, ..., E. Marban. 1994. Mechanism of force inhibition by 2,3-butanedione monoxime in rat cardiac muscle: roles of  $[Ca^{2+}]_i$  and cross-bridge kinetics. *J. Physiol.* 476:487–500.
48. Süel, G. M., J. Garcia-Ojalvo, ..., M. B. Elowitz. 2006. An excitable gene regulatory circuit induces transient cellular differentiation. *Nature.* 440:545–550.
49. Hong, H., and S. H. Strogatz. 2011. Kuramoto model of coupled oscillators with positive and negative coupling parameters: an example of conformist and contrarian oscillators. *Phys. Rev. Lett.* 106:054102.
50. Kuramoto, Y. 1984. Chemical Oscillations, Waves, and Turbulence. Springer, Berlin, Germany.
51. O'Leary, D. P. 2001. Near-optimal parameters for Tikhonov and other regularization methods. *SIAM J. Sci. Comput.* 23:1161–1171.
52. Park, H. W., S. Shin, and H. S. Lee. 2001. Determination of an optimal regularization factor in system identification with Tikhonov regularization for linear elastic continua. *Int. J. Numer. Methods Eng.* 51:1211–1230.
53. Fang, H., M. Chen, ..., H. Cheng. 2011. Imaging superoxide flash and metabolism-coupled mitochondrial permeability transition in living animals. *Cell Res.* 21:1295–1304.



# Mitochondrial Networks in Cardiac Myocytes Reveal Dynamic Coupling Behavior

**Felix T Kurz, MD**

**Thomas Derungs, MS**

**Miguel A Aon, PhD**

**Brian O'Rourke, PhD**

**Antonis A Armoundas, PhD**

## **Experimental Methods**

### ***Isolated Myocyte Preparation***

All experiments have been conducted on freshly isolated adult guinea pig ventricular myocytes according to previously described protocols (1-3) and in accordance with Guide for the Care and Use of Laboratory Animals (NIH, No. 85-23, 1996) and the Johns Hopkins Animal Care and Use Committee. Adult guinea pigs (300 g) were anesthetized with 260 mg pentobarbital and 1000 U heparin sodium (i.p.).

Hearts were excised and ventricular myocytes were enzymatic isolated as previously described (3). After isolation, myocytes were stored briefly in a high K<sup>+</sup> solution (in mM: 120 potassium glutamate, 25 KCl, 1 MgCl<sub>2</sub>, 10 HEPES, 1 EGTA, pH 7.2 (with KOH) and either used immediately or transferred to Dulbecco's Modification of Eagle's Medium (10-013 DMEM, Mediatech, Inc. Virginia, Manassas, VA, USA) in laminin-coated petri dishes in a 95% O<sub>2</sub>, 5% CO<sub>2</sub> incubator at 37°C for 1-2 h before imaging. Experimental recordings started after exchange of the DMEM with Tyrode's solution containing (in mM): 140 NaCl, 5 KCl, 1 MgCl<sub>2</sub>, 10 HEPES, 1 CaCl<sub>2</sub>, pH 7.4 (adjusted with NaOH), supplemented with 10 mM of glucose, or β-hydroxybutyrate, or lactate or pyruvate.

### ***Whole Heart Preparation***

Excised hearts were retrogradely perfused with an oxygenated (100% O<sub>2</sub>) modified Tyrode's solution (138 mM NaCl, 4 mM KCl, 0.5 mM CaCl<sub>2</sub>, 1 mM MgCl<sub>2</sub>, 0.33 mM NaH<sub>2</sub>PO<sub>4</sub>, 10 mM glucose, 10 mM HEPES pH 7.4 containing 20mM butanedione monoxime (BDM) to suppress contraction (4). A custom-built chamber was used to minimize pulsatile motion artifacts and imaging focused on epicardial regions located near (within 5 mm) the left anterior descending coronary artery (5).

### ***Imaging Studies***

The cationic potentiometric fluorescent dye tetramethylrhodamine ethyl ester (TMRE) was used to monitor the mitochondrial inner membrane potential  $\Delta\Psi_m$  and images were recorded with a two-photon laser-scanning microscope (Bio-Rad MRC-1024MP, Hercules, CA, USA) using excitation at 740 nm (Tsunami Ti:Sa laser, Spectra-Physics, Santa Clara, CA, USA) and emission at 605±45nm.

### **Selection and processing of TMRE fluorescence from individual mitochondria in isolated cardiac myocytes**

TMRE signals from individual mitochondria were analyzed in stacks of recorded frames of isolated myocytes by manually applying a grid template to the myocytes. Stack images were time-averaged using Adobe Photoshop v7.0 according to previously described methods (6) (Figure 1B in main text). Briefly, time-dependent mesh identifiers applied to each myocyte allowed the identification of individual mitochondria, while correction for myocyte movement was accomplished with ImageJ (v.1.40g).

Selection of wavelet parameters, cut-off frequencies, normalization of mitochondrial TMRE signals and determination of maximal wavelet power frequencies were carried out according to the modus operandi in (6, 7). Morlet wavelets were used for each mitochondrion's TMRE signal with spacing between scales set to  $dj = 0.1$ . The smallest wavelet scale was set to  $s_0 = 4dt$  since this scale size represents the smallest possible scale that could be detected during one oscillatory cycle. With the total number,  $N$ , of recorded images per myocyte, the number of scales was taken as  $j_1 = \log_2(N/s_0)/dj + 1$ . Therefore, scales range from  $s_0$  to  $s_0 2^{(j_1-1)dj}$  and each scale has  $dj$  suboctaves. Cut-off frequencies were chosen for each myocyte according to the longest observed oscillation period,  $T$ , and therefore the minimum cut-off frequency was defined as  $\nu_{\min} = 1/1.1T$ . The maximum cut-off frequency was fixed at

$\nu_{\max} = 1/s_0$ , the highest possibly observable period. Between  $\nu_{\min}$  and  $\nu_{\max}$ , for each myocyte, power line plots with segments of 0.1 mHz were interpolated and, finally, the maximum power for each interpolated plot was used to determine the respective maximal scale frequency at each time point.

Determination of frequency cluster mitochondria as well as their size, frequency, amplitude and coherence properties was completed according to the algorithm for the selection of mitochondria belonging to a major frequency cluster as detailed in Kurz et al. (7). Frequency histograms were obtained for each myocyte at every time-point  $t$  and the largest peak of mitochondria with similar frequencies, i.e. mitochondria belonging to a (major) frequency cluster, was determined as the major cluster peak. Subsequently, mitochondria belonging to neighboring peaks, i.e. peaks whose amplitude was beyond 10% of the maximum peak and directly neighboring the major cluster peak, were incorporated into the cluster if their TMRE signal at  $t$  was correlated with at least 95% with the cluster signal (see also Figure 2A in (7)). Cross correlation was computed over a running window of size  $T_w = 1.1T$ . The procedure was repeated with the ensuing neighboring significant peaks until signal correlation dropped below 95%. The resulting mitochondria therefore form a group of oscillators at time  $t$  who have similar frequencies and whose signals are highly correlated, as previously described (7).

### ***Selection and processing of individual mitochondrial TMRE fluorescent signal in the whole heart***

Whole heart samples were scanned for de- and repolarizing mitochondria. Only myocytes showing at least one depolarization, i.e. a drop of more than 10% in TMRE fluorescence in some of their mitochondria were taken into account. Myocyte borders along sarcolemma and intercalated discs were manually applied on a pixel-by-pixel basis in Adobe Photoshop v7.0 (Figure 1A in the main text and Figure S1A). Grid templates were constructed for each selected myocyte and further spatio-temporal processing was done using wavelet analysis and major frequency cluster selection as in the case of the isolated myocyte (see above and (6, 7)).

## **Computational Methods**

### ***Mitochondrial Network Architecture***

Identification of mitochondrial nearest neighbors was used as in (7) to determine the mitochondrial network's structural topology. To examine the network's connectivity properties,

inter-mitochondrial coupling was only considered for local nearest-neighbors (Figure 2 in main text).

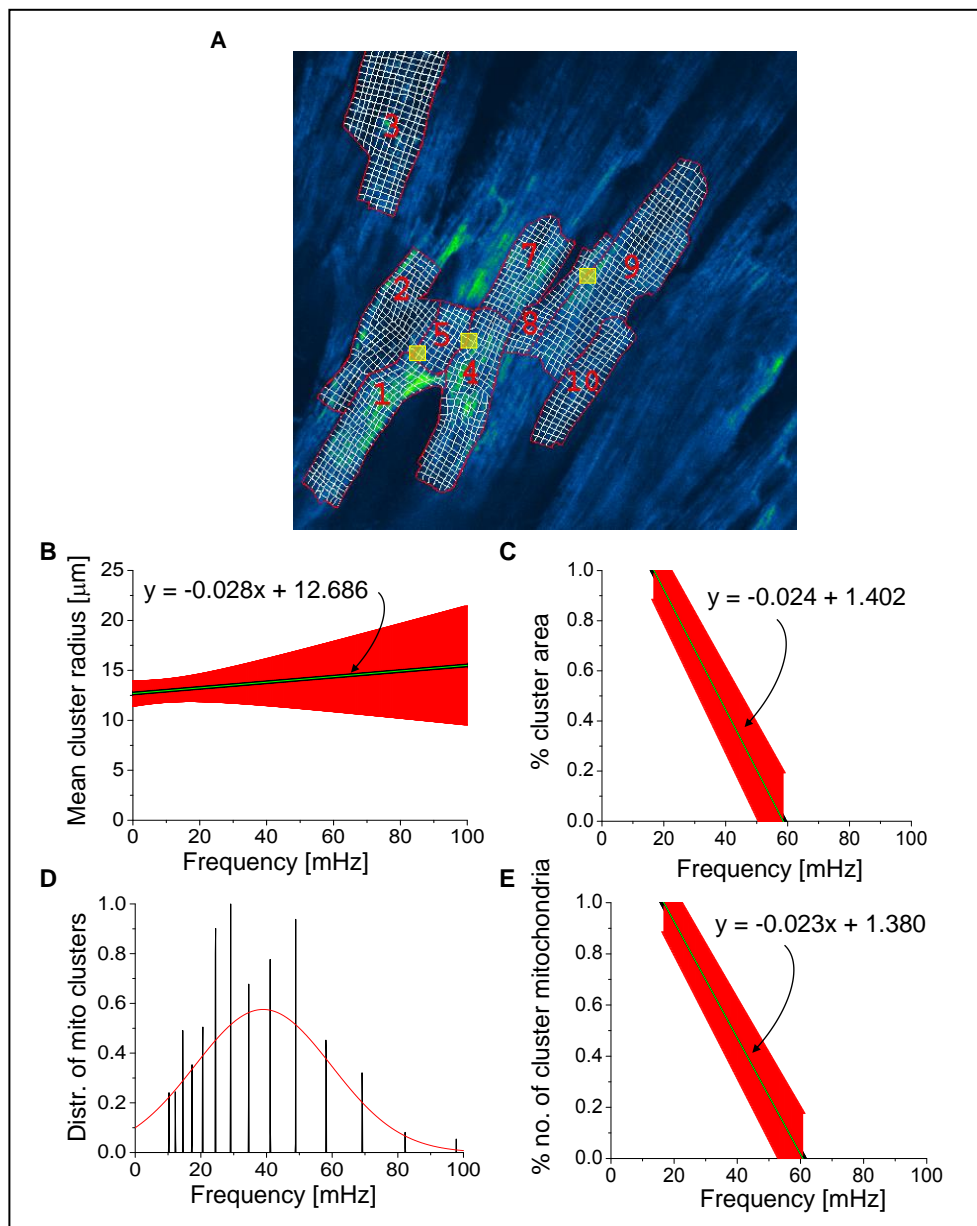

**Figure S1** Two-photon image of TMRE fluorescence from intact guinea pig heart tissue (different to the one shown in Figure 3 of the main text). (A) Within the intact heart tissue, cardiac myocytes were selected according to observed depolarizations. Myocyte borders along the sarcolemma and intercalated discs, as well as the mitochondrial grids were manually applied on a pixel-by-pixel basis. Yellow boxes mark the laser flashed region of the myocytes (see main text). Mitochondrial major cluster properties of the optical slice of perfused heart tissue shown in part A ( $n = 9$  cardiac myocytes). Displayed are the mean cluster radius versus frequency (B); the cluster area normalized by the full myocyte area versus frequency (C); the distribution of mitochondrial frequencies for all cluster mitochondria across all myocytes (D), and the cluster mitochondria count normalized by the total number of mitochondria for the major cluster versus frequency (E). A similar figure for another optical slice of the intact heart tissue can be found in the main text (Figure 1A and Figure 3).



A

$$\frac{d\varphi_m(t)}{dt} = \omega_m(t) + K_m(t) \sum_{j_i \in \mathcal{N}} \sin(2\pi(\varphi_{j_i}(t) - \varphi_m(t)))$$

$$\frac{d\omega_m}{dt} = -\gamma(\omega_m - \mu_m) + \eta_m(t)$$

$$s(t) = \frac{1}{M} \sum_m \cos(\varphi_m)$$

B

| Symbol         | Description                                        |
|----------------|----------------------------------------------------|
| $\varphi_m(t)$ | Phase for mito $m$                                 |
| $\omega_m(t)$  | Intrinsic frequency for mito $m$                   |
| $\mu_m(t)$     | Mean circadian frequency for mito $m$              |
| $\sigma_m$     | Frequency dispersion for mito $m$                  |
| $\gamma$       | Frequency relaxation rate                          |
| $\eta_m(t)$    | White noise source with variance $\sigma_{\eta}^2$ |
| $K_m(t)$       | Coupling constant for mito $m$                     |
| $s(t)$         | Normalized intensity signal for mito $m$           |

**Table S1** Stochastic phase model with drifting frequencies and time-dependent local mitochondrial coupling. (A) An extended Kuramoto model for the oscillator phases  $\varphi_m(t)$  and frequencies  $\omega_m(t)$  describes coupled circadian phase oscillators.  $N_m$  is the total number of nearest neighbors of mitochondrion  $m$ . The sum of the coupling term runs over all nearest neighbors  $j_m$  of mitochondrion  $m$ . The total luminescence signal  $s(t)$  is the sum of a population of all oscillators contributing an amplitude-normalized cosine signal.  $M$  is the total number of mitochondrial oscillators and the sum of cosines runs over all mitochondrial oscillators. (B) Parameter listing.  $K_m(t)$  represents the time-dependent local mitochondrial phase coupling constant.

### ***Mitochondrial Wavelet Phase and Wavelet Frequency***

Wavelet phases were extracted from the TMRE fluorescent signal corresponding to each mitochondrion. The wavelet transform coefficients phase at maximal wavelet power as in the frequency case. Wavelet frequencies are non-differentiable in time at points of frequency change, therefore wavelet frequencies were monitored as dynamical wavelet phase updates with the value of the actual wavelet frequency as starting point. The resulting updated wavelet

frequency was median filtered to correct for frequency changes at the turning point of phase cycles.

### **Ornstein-Uhlenbeck Processes**

Within the stochastic coupling model of the mitochondrial network, mitochondrial intrinsic frequencies are modeled as frequencies that drift in time towards the respective measured mitochondrial frequency, i.e. the mitochondrial wavelet frequency. This accounts for dynamical changes in mitochondrial frequency and can be accomplished via Ornstein-Uhlenbeck processes that are described by the stochastic differential equation (8-10) of the form:

$$\frac{d\omega_m}{dt} = -\gamma(\omega_m - \mu_m) + \eta_m(t)$$

where  $\mu_m$  represents the mean frequency towards which the intrinsic mitochondrial frequency is drifting,  $\eta_m$  is a Gaussian white noise source with variance  $\sigma_\eta^2 = 2\gamma\sigma_m^2$ ,  $\gamma$  represents the decay rate, and  $\sigma_m^2$  the amplitude of mitochondrial frequency fluctuations (9, 11). The mean frequency  $\mu_m$  was chosen as the time-dependent wavelet frequency of the  $m$ -th mitochondrion whereas the free constant  $\gamma$  was assumed to be identical for each mitochondrion in the network. The frequency fluctuation amplitude measure,  $\sigma_m$ , for each mitochondrion was taken as the standard variation of the measured mitochondrial wavelet frequency (see Table S1).

Discrete dynamical updates were performed to calculate the mitochondrial intrinsic frequencies (12):

$$\omega_m(t + dt) = \omega_m(t)e^{-\gamma dt} + \mu_m(t)(1 - e^{-\gamma dt}) + \sqrt{1 - e^{-2\gamma dt}} \zeta \quad (1)$$

where  $\zeta$  is a random number drawn from a Gaussian distribution with zero mean and variance  $\langle \zeta \rangle = \sigma_m^2$ . In this step-by-step update process,  $dt$  represents the sampling period of the measurements of the respective myocytes. Initially,  $\omega_m(0)$  was taken from a Gaussian with mean  $\mu_m(dt)$  and variance  $\sigma_m^2$ .

### **Local Order Parameter Selection**

Local mitochondrial coupling was considered to be of local mean field type, and local mean field parameters  $R_m(t)$  and  $\psi_m(t)$  corresponding to mitochondrion  $m$  are defined as

$$R_m(t)e^{2i\pi\psi_m(t)} = \frac{1}{|L_m|} \sum_{j \in L_m} e^{2i\pi\varphi_j(t)},$$

where  $L_m$  is the set of nearest neighbors of mitochondrion  $m$  (c.f. (9, 11)), and  $|L_m|$  the number of nearest neighbors. This corresponds to phase differential equations of the form:

$$\frac{\partial \varphi_m(t)}{\partial t} = \omega_m(t) + K_m(t)R_m(t)\sin(2\pi(\psi_m(t) - \varphi_m(t))) \quad (2)$$

for each mitochondrion  $m$ .

### **Update Equations and Tikhonov Regularization**

Within local mean field coupling, the left hand side of Eq. 2 corresponds to the updated wavelet frequency  $\nu_m^{WT}$  of mitochondrion  $m$  that provides

$$\nu_m^{WT}(t) - \omega_m(t) \approx K_m(t)R_m(t)\sin(2\pi(\psi_m(t) - \varphi_m(t))) \quad (3)$$

It is evident, that  $K_m$  can become negative for some time points  $t_p$  (if  $R_m(t_p)\sin(2\pi(\psi_m(t_p) - \varphi_m(t_p))) \neq 0$ ). In this model, we assume the mitochondrial coupling constants to be positive. This corresponds to the interpretation of an attractive coupling interaction between the oscillators, as was also originally assumed by Kuramoto (13, 14). Therefore, update equations for  $\omega_m$  were subjected to the constraint:

$$\frac{\nu_m^{WT}(t) - \omega_m(t)}{R_m(t)\sin(2\pi(\psi_m(t) - \varphi_m(t)))} > 0$$

for all time points.

In addition, solving for  $K_m(t)$  proves difficult at points  $t_0$  with

$$\lim_{t \rightarrow t_0} R_m(t)\sin(2\pi(\psi_m(t) - \varphi_m(t))) \rightarrow 0$$

If one or more of such points existed for mitochondrion  $m$ , then the Tikhonov regularization was applied (15, 16). Setting

$$P_m(t) = R_m(t) \sin(2\pi(\psi_m(t) - \varphi_m(t)))$$

gives the explicit solution

$$\hat{K}_m = (P_m^2 + \lambda 1_T)^{-1} P_m^T (V_m^{WT} - \omega_m) \quad (4)$$

with  $1_T$  as the unity matrix of size  $T$  ( $T$  being the recording time) and Tikhonov parameter  $\lambda$  (16). Optimization for  $\lambda$  was obtained using the Hanke-Reus algorithm (15) on the interval  $[(1/100) \cdot M, 100 \cdot M]$ , where  $M = \sqrt{PP_m P^2} / T$  is the time-averaged value of  $P_m(t)$ . The Tikhonov parameter  $\lambda$  was set to  $\lambda = \frac{T}{100} \sqrt{PP_m P^2}$  when the optimization did not converge. Each curve  $K_m(t)$  was padded for  $t < 0$  and  $t > T$  with the mirror values of  $K_m(t)$  for the respective vertical mirror axes at  $t = 0$  and  $t = T$  and the resulting curves were subsequently median filtered.

### **Optimization of Decay Rate Parameter $\gamma$**

Maximum likelihood estimation was applied to optimize the model parameter  $\gamma$  within the interval  $[0, 1] \text{ s}^{-1}$ . This interval was chosen empirically, based on the observation that normalized errors of  $\gamma$  in a forward model reach a global minimum plateau for values  $> 0.2 \text{ s}^{-1}$  for all myocytes (see Figures S6- S7). Basically,  $\gamma$  was taken along the interval in steps of 0.01 to calculate  $\gamma$ -dependent mitochondrial coupling constants  $K_m(t, \gamma)$ . All coupling constants  $K_m(t, \gamma)$  were consequently averaged over Ornstein-Uhlenbeck frequencies with two different starting points  $\omega_m(0)$  and two differently dynamically evolving  $\omega_m$  respectively.

In the next step, the  $K_m(t, \gamma)$  was introduced in equation (2) together with the local mean field parameters  $R_m$  and  $\psi_m$  and random Ornstein-Uhlenbeck frequencies  $\omega_m$  to model (forward) the mitochondrial phases  $\varphi_m^{FM}(t, \gamma)$ . The corresponding signal

$$\frac{1}{M} \sum_m \cos(\varphi_m^{FM}(t, \gamma)) ,$$



(where  $M$  is the total number of mitochondria) was compared for each  $\gamma$  against the cosine of the phase of the overall TMRE signal of the myocyte by determining the least square error.  $\gamma$ -dependent error values were plotted versus  $\gamma$  and, if they were asymptotically approaching a fixed error value, they were exponentially fitted using an exponential function ( $f(x) = a \cdot \exp(-bx) + c$ ). Starting from time 0 and using steps of  $0.01 \text{ s}^{-1}$ , the optimal decay rate parameter for each myocyte was chosen as the first value of  $\gamma$  whose error value was within 1% range of the value of the asymptotic error value. If  $\gamma$  did not asymptotically approach a fixed error value but displayed instead a global minimum in the error values, the optimal  $\gamma$  was taken at this minimum.

### ***Coupling Constants***

With optimal decay rate parameter  $\gamma$  the coupling constants  $K_m(t)$  were evaluated for 10 different starting points  $\omega_m(0)$  and 100 differently dynamically evolving Ornstein-Uhlenbeck frequencies  $\omega_m$  as described above.

### ***Frequency and Cluster-Size Relationship in the Intact Perfused Heart***

The rate of change of mean cluster radius with respect to the frequency for glucose-treated myocytes, in addition to the one presented in the main text (Figures 1A and 3), was also calculated for another optical slice of perfused heart tissue (Figure S1A), to be  $0.03 \pm 0.01 \text{ } \mu\text{m/mHz}$ . The apparent discrepancy between the negative slope shown in Figure 3A of the main text and Figure S1A, is due to the determination of the geometrical center of all cluster mitochondria for a specific time point that is computed using the average  $\bar{R}$  of all distances  $R_i$  of all  $N$  cluster mitochondria to the geometrical center as  $\bar{R} = \sum_{i=1}^N R_i / N$ . Naturally, for mitochondria that are distributed closely together, the average radius is smaller than in myocytes where cluster mitochondria are far apart from each other, e.g. at opposing ends of the myocyte. This explains why a cluster with more mitochondria does not necessarily have a greater radius than one with less mitochondria. This spread of mitochondria is much pronounced in the intact perfused heart in Figure S1A than for Figure 3A in the main text. This effect also explains the different frequency ranges that are due to interpolation error (see Figure 3A in the main text).

Summary statistics of mitochondrial frequency distributions of major cluster mitochondria for all cardiac myocytes of the respective whole heart yields frequency ranges of 10.30 - 100 mHz. It is evident that the range of mitochondrial frequencies in myocytes from whole heart preparations are significantly broader than in isolated myocytes, i.e., mitochondria generally oscillate at higher frequencies in the intact perfused heart. Using Figure 3A and Figure S1B we calculated a mean cluster radius of  $\sim 11 - 17 \mu\text{m}$ .

The rate of change of % area versus frequency for cardiac myocytes was determined as  $-2.40 \pm 0.10 \%$  / mHz. Likewise, the % number of cluster mitochondria versus frequency gave a rate of change of  $-2.27 \pm 0.10 \%$  / mHz. These values are in close agreement with the ones reported in the main text.

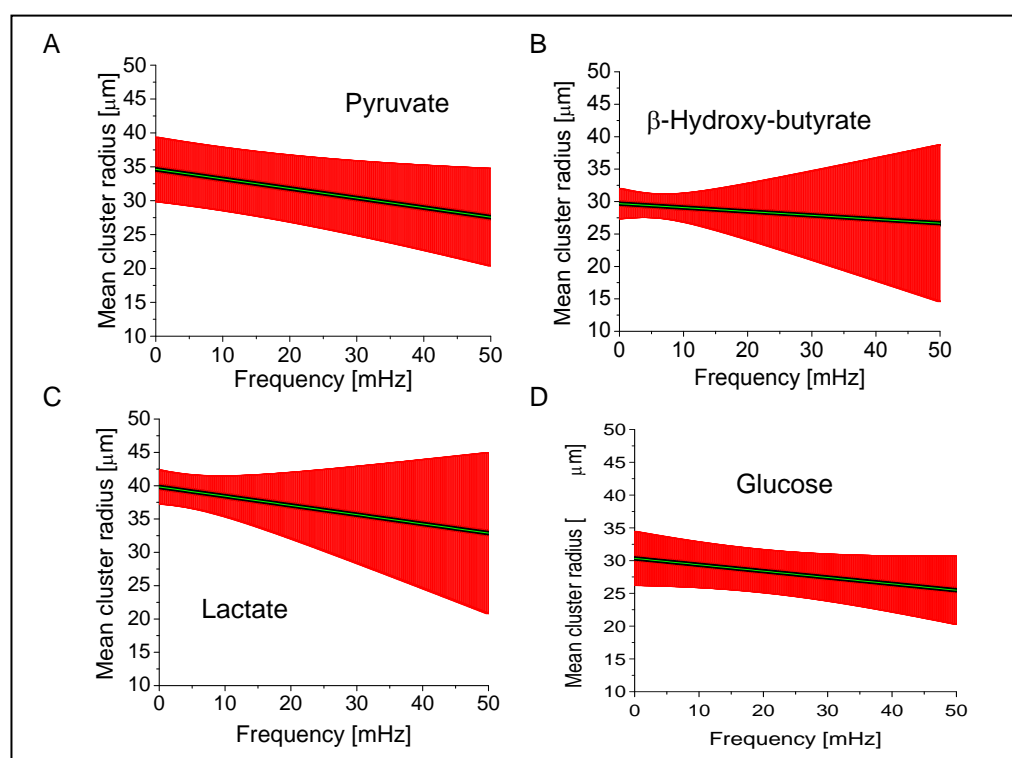

**Figure S2** Mitochondrial mean cluster radius as a function of frequency. Isolated cardiac myocytes were imaged as described in Methods and perfused as described in the legend of Figure 4 with 10mM of pyruvate(A; n=10),  $\beta$ -hydroxybutyrate (B; n=14), lactate (C; n=7), or glucose (D; n=9).

### ***Frequency and Cluster-Size Relationship in Isolated Myocytes***

Major cluster mitochondria were determined for each myocyte treated with glucose, lactate,  $\beta$ -hydroxybutyrate or pyruvate. The relative number of cluster mitochondria (quotient of the number of cluster mitochondria versus the total number of mitochondria) was plotted against

the mean frequency (Figure S2). Also, measures for cluster size were compared with the mean frequency of the cluster mitochondria. Therefore, the mean cluster radius (the distance of the geometrical center of the cluster to each single cluster mitochondrion's geometrical center averaged over all cluster mitochondria) was plotted against the mean frequency of the cluster (Figure S3).

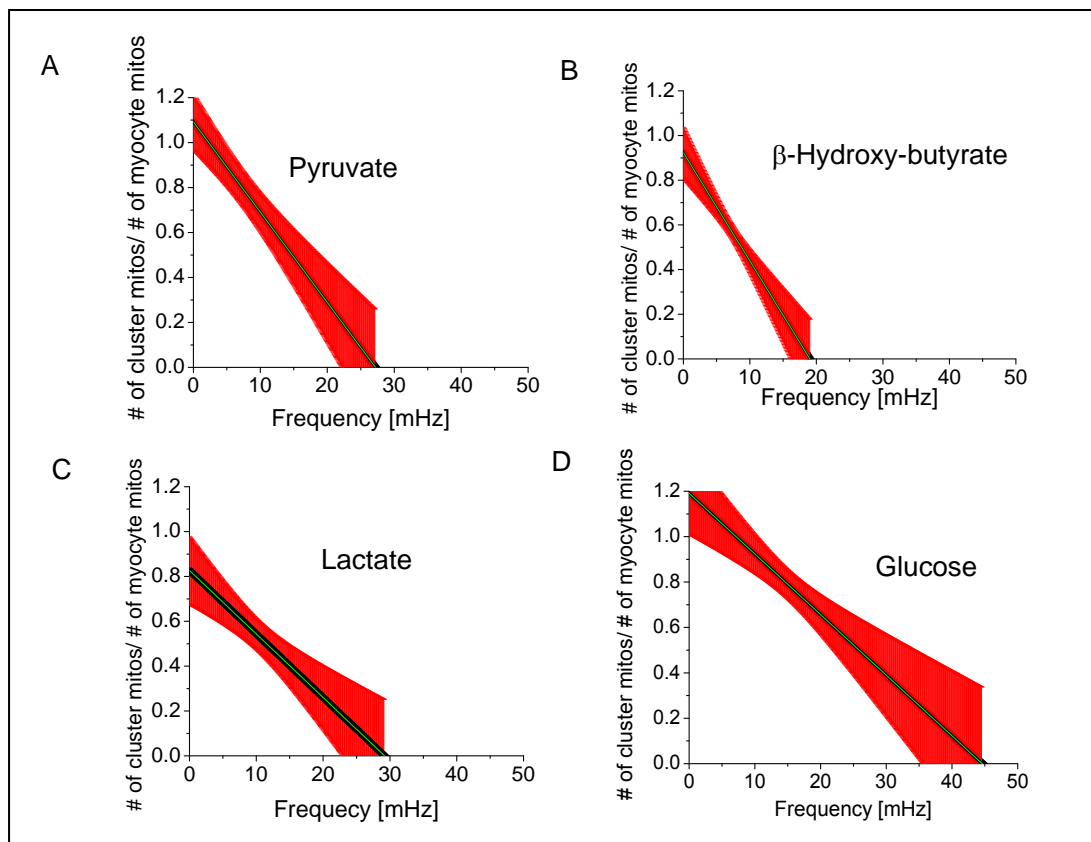

**Figure S3** Mitochondrial cluster count normalized by the total number of mitochondria for the major cluster versus frequency for isolated cardiac myocytes perfused with 10mM of pyruvate (A; n=10),  $\beta$ -hydroxybutyrate (B; n=14), lactate (C; n=7), or glucose (D; n=9) .

From Figure S2 we obtain that the mean radius of the oscillating clusters of mitochondria for glucose-, pyruvate-, lactate- and  $\beta$ -hydroxybutyrate-treated myocytes is  $\sim 27 - 30 \mu\text{m}$ ,  $\sim 27 - 35 \mu\text{m}$ ,  $\sim 37 - 40 \mu\text{m}$  and  $\sim 29 - 30 \mu\text{m}$ , respectively. High standard errors in Figure S2 are due to topological non-contingencies of the mitochondrial major clusters, indicating a distribution of major cluster mitochondria similar to spanning clusters (7, 17, 18). In some myocytes, we have observed that with the onset of synchronized depolarizations, major frequency cluster mitochondria appear dispersed throughout the myocyte but grow more and more to be

topologically contiguous during the course of the recording. However, non-contiguous cluster mitochondria with a high degree of separately oscillating mitochondrial clusters have been observed in particular for pyruvate- or glucose-treated myocytes. The rate of change of mean radius with respect to the frequency for myocytes from the glucose-, pyruvate-, lactate- or  $\beta$ -hydroxybutyrate-group have been calculated to be:  $-0.0973 \pm 0.129 \mu\text{m}/\text{mHz}$ ,  $-0.141 \pm 0.017 \mu\text{m}/\text{mHz}$ ,  $-0.139 \pm 0.018 \mu\text{m}/\text{mHz}$  and  $-0.060 \pm 0.016 \mu\text{m}/\text{mHz}$ , respectively.

The rate of change of % number of cluster mitochondria versus frequency for glucose-, pyruvate-, lactate- or  $\beta$ -hydroxybutyrate-treated cardiac myocytes was determined to be  $-2.67 \pm 1.12 \% / \text{mHz}$ ,  $-4.01 \pm 0.07 \% / \text{mHz}$ ,  $-2.83 \pm 0.07 \% / \text{mHz}$  and  $-4.79 \pm 0.07 \% / \text{mHz}$ , respectively. This is similar to the results for % area of cluster mitochondria versus frequency as detailed in the main text.

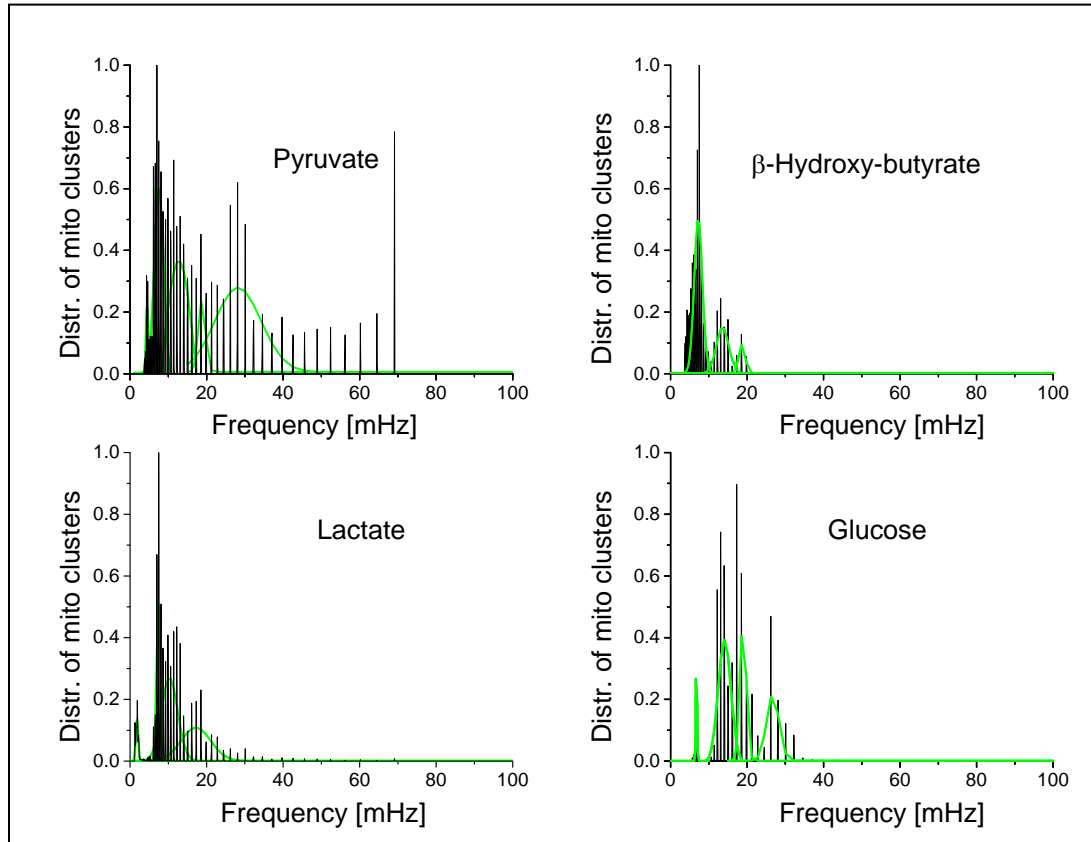

**Figure S4** Distribution of mitochondrial frequencies for all cluster mitochondria across all myocytes perfused with 10mM of pyruvate (A; n=10),  $\beta$ -hydroxybutyrate (B; n=14), lactate (C; n=7), or glucose (D; n=9).

### ***Distribution of mitochondrial frequencies***

Frequency distributions of mitochondria belonging to the major cluster were constructed with frequency histograms across all frames (Figure S4) for each cardiac myocyte in each substrate group. Mitochondrial frequencies were counted in bins of width 0.1 mHz in the range [0-100] mHz.

To compare between myocytes within one substrate group, cluster mitochondria frequency counts in each frame were divided by the number of cluster mitochondria in that frame and amplitudes at each frequency were divided by the total number of frames. Gaussian functions were then fitted to visible peaks in the resulting histogram for each substrate group. Their position and the corresponding frequency bandwidth within the full width at half maximum (FWHM) around the mean frequency can be found in Table S2. For glucose-treated myocytes, the overall mean frequency was found as  $17.11 \pm 11.88$  mHz whereas, in comparison, pyruvate-treated myocytes show a more dispersed frequency distribution with a mean frequency  $18.29 \pm 32.20$  mHz (with the lowest detectable frequency being 3.7 mHz). Myocytes from the lactate group were found to be more narrowly distributed with a mean frequency  $10.14 \pm 12.72$  mHz (with the lowest detectable frequency being 1.3 mHz). Finally, myocytes that were perfused with  $\beta$ -hydroxybutyrate mostly displayed major cluster oscillations in the low frequency range  $8.36 \pm 8.50$  mHz (with the lowest detectable frequency being 3.7 mHz).

| Perfusion type / Peak # | Glucose              | Pyruvate             | Lactate              | $\beta$ -Hydroxy-Butyrate |
|-------------------------|----------------------|----------------------|----------------------|---------------------------|
| 1                       | $6.79 \pm 0.24$ mHz  | $4.46 \pm 0.63$ mHz  | $1.822 \pm 0.67$ mHz | $7.25 \pm 2.14$ mHz       |
| 2                       | $14.12 \pm 3.33$ mHz | $7.54 \pm 2.56$ mHz  | $7.44 \pm 1.03$ mHz  | $13.59 \pm 3.18$ mHz      |
| 3                       | $18.98 \pm 1.67$ mHz | $12.73 \pm 9.23$ mHz | $10.31 \pm 4.24$ mHz | $18.71 \pm 1.66$ mHz      |
| 4                       | $26.71 \pm 3.22$ mHz | $18.74 \pm 1.88$ mHz | $17.20 \pm 7.73$ mHz |                           |
| 5                       |                      | $28.21 \pm 4.13$ mHz |                      |                           |

**Table S2** Multi-Peak Gaussian fit analysis for peaks in the frequency distributions of cardiac myocytes perfused with different substrates. For each peak, the mean frequency  $\pm$  the FWHM are given in mHz.

### Cluster Oscillation Coherence

The temporal properties of cluster mitochondria can be analyzed by investigating the average temporal coherence of the TMRE signal of a cluster mitochondrion with those of its nearest neighbors for all major cluster mitochondria. Coherence values range between 0 and 1 at each frequency representing oscillation in synchrony (“1”) or asynchrony (“0”). The frequency range for each myocyte was chosen from zero to 100 mHz and coherences of each cluster mitochondrion were estimated using a running window of fixed size  $T_w$  and a fixed Fast-Fourier-Transform (FFT) of length  $2^{11}dt$  (7).

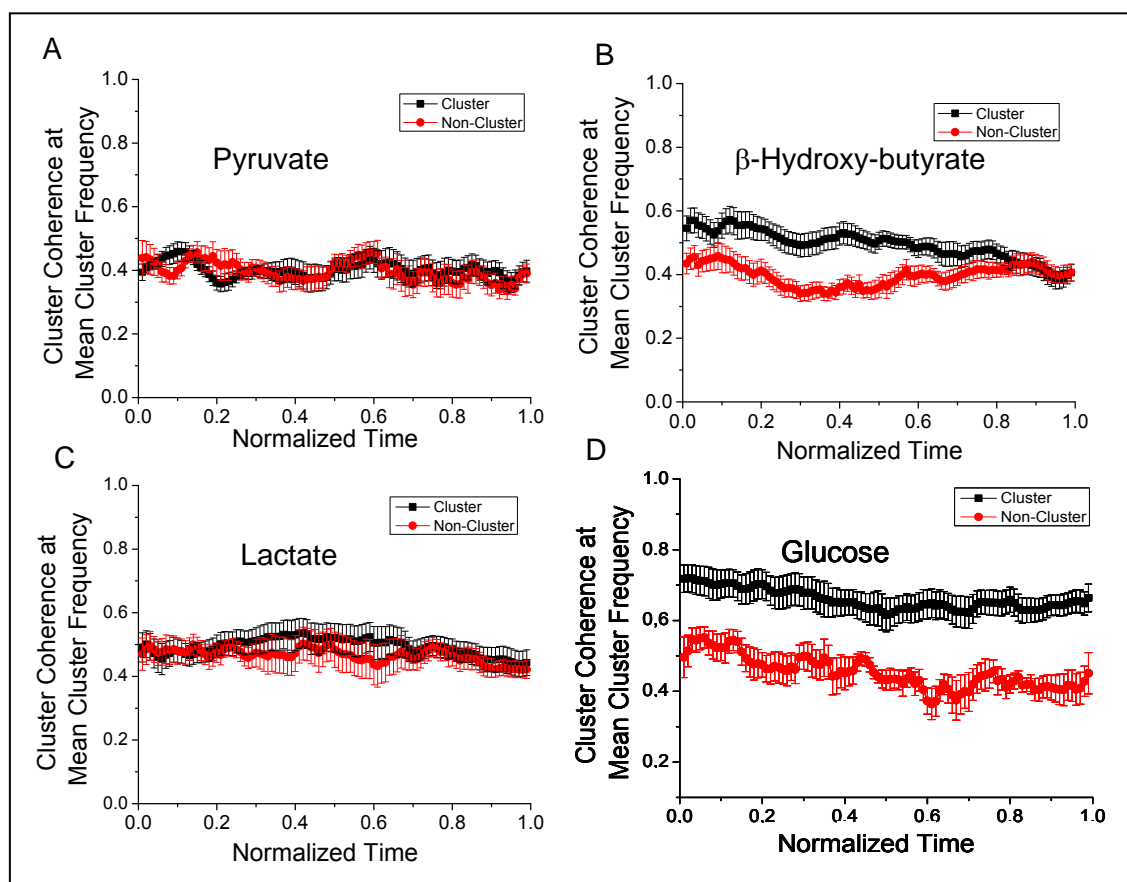

**Figure S5** Coherence of mitochondria belonging to the major oscillating cluster, estimated at the mean cluster frequency, for 10mM of pyruvate (A;  $n=10$ ),  $\beta$ -hydroxybutyrate (B;  $n=14$ ), lactate (C;  $n=7$ ), or glucose (D;  $n=9$ ). To allow the statistical comparison between myocytes with unequal time recordings, the duration of the oscillations for each recording was normalized.

For each cluster mitochondrion, at each frequency, the average coherence in the running window was obtained from the average coherence over all nearest neighbors belonging to the cluster, followed by another averaging of the coherence over all cluster mitochondria. The fixed running window was subsequently shifted by one frame at a time until reaching the last frame of the recorded signal with its own last frame. A mean coherence for the mean major cluster frequency and for each running window was determined and plotted as a function of time. The length of recording for each myocytes was normalized to range from zero to one for a better comparison.

There was no significant change in the coherence of the cluster mitochondria during recording across the different substrate groups, indicating high temporal stability of the respective oscillating cluster mitochondria (Figure S5). However, the coherence of cluster mitochondria averaged in time seem to be highest in the glucose-treated cardiac myocytes being  $0.66 \pm 0.04$ , whereas the coherence in the pyruvate-, lactate- and  $\beta$ -hydroxybutyrate substrate groups were  $0.40 \pm 0.03$ ,  $0.49 \pm 0.04$  and  $0.49 \pm 0.03$ , respectively.

The coherence values for mitochondria that do not belong to the major cluster were estimated to be  $0.44 \pm 0.04$ ,  $0.39 \pm 0.04$ ,  $0.46 \pm 0.04$  and  $0.39 \pm 0.03$  for glucose-, pyruvate-, lactate- and  $\beta$ -hydroxybutyrate-treated cardiac myocytes, respectively. Thus, non-cluster mitochondria coherence appears to be high and similar across the different substrate groups. As suggested in (7) this may be due to stable oscillations of non-cluster mitochondria at frequencies that are different to the frequencies at which major cluster mitochondria oscillate. The coherence values observed for cluster and non-cluster mitochondria in glucose-treated myocytes (7) are consistent with those obtained in this work across all substrates, although less pronounced with lactate or pyruvate. This might be due to a decreased level of mitochondrial nearest-neighbor coupling during de- and repolarizations. Specifically, in the case of pyruvate-treated cardiomyocytes, smaller and more topologically dispersed ensembles of major cluster mitochondria have been observed. This increases the number of mitochondria within the major cluster that have at least one non-cluster nearest neighbor mitochondrion. Also, the number of non-cluster nearest neighbors for the majority of individual cluster mitochondria is increased. The alignment of temporal properties of a cluster mitochondrion with its neighboring mitochondria might therefore be less prominent, thus providing a lower averaged coherence.

### ***Decay Rate Parameter $\gamma$***



The  $\gamma$  value for each myocyte was optimized in the forward modeled whole myocyte TMRE signal to fit the experimental, amplitude-normalized TMRE fluorescent signal corresponding to the whole myocyte (Figures S6-S7). For each substrate, the mean decay rate parameter  $\gamma$  was quantified (in  $s^{-1}$ ):  $7.13 \cdot 10^{-2} \pm 1.55 \cdot 10^{-2}$  and  $6.46 \cdot 10^{-2} \pm 1.14 \cdot 10^{-2}$  for glucose and  $\beta$ -hydroxybutyrate, respectively whereas pyruvate and lactate showed slightly smaller values:  $6.10 \cdot 10^{-2} \pm 1.26 \cdot 10^{-2}$  and  $6.29 \cdot 10^{-2} \pm 1.17 \cdot 10^{-2}$ , respectively (Figure S7).

### Forward Model and Model Validation

Forward modeling for whole-cell intensity signals with myocyte-specific  $\gamma$  and mitochondrial coupling constants was performed by cross-correlating the cosine of the whole-myocyte TMRE signal wavelet phase and the sum of cosines of the forward modeled phases of

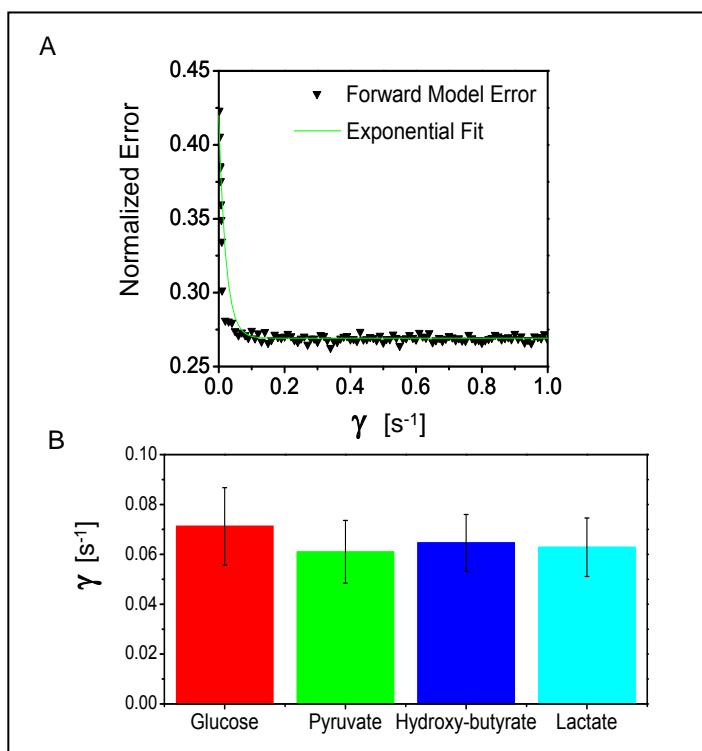

**Figure S6** Minimum error estimation of decay rate parameter  $\gamma$  in the interval  $[0,1] s^{-1}$  for glucose, pyruvate, lactate and  $\beta$ -hydroxybutyrate respectively. (A) Normalized error of forward modeled  $\gamma$ -dependent stochastic phase model versus  $\gamma$  for a glucose-perfused cardiac myocyte. Exponential fit curve of type  $f(x) = a \cdot \exp(-bx) + c$  (green line). Step increase of  $0.01 s^{-1}$  starting from 0, the optimal decay rate parameter was chosen as the first  $\gamma$  whose error value was within 1% range of the value of the asymptotic error value (here,  $\gamma = 0.12 s^{-1}$ ). (B) Values of the optimal decay rate parameters for glucose-, pyruvate-,  $\beta$ -hydroxybutyrate- and lactate-perfused cardiac myocytes. The  $\gamma$  distributions were not significantly different to each other (one-way ANOVA: F-value = 0.14, p-value = 0.9366).

the stochastic model (Figure S8). High correlation coefficients indicate the similarity of predicted and experimental signals, validating the determined coupling constants. Calculated correlation coefficients for each cardiac myocyte were  $0.88 \pm 0.02$ ,  $0.64 \pm 0.05$ ,  $0.85 \pm 0.03$  and  $0.75 \pm 0.03$  for glucose-, pyruvate-, lactate- and  $\beta$ -hydroxybutyrate-treated myocytes respectively (Figure S9).

The rather insignificant results for cardiac myocytes treated with pyruvate imply that the stochastic mitochondrial phase modeling may not be applicable when cardiac myocytes exhibit both a high degree of frequency dispersion and a low degree of cluster proximity. This problem could be partly avoided by only focusing on for example, ten cluster mitochondria that exhibit the highest averaged signal cross-correlation to their nearest neighbors thus ensuring cluster

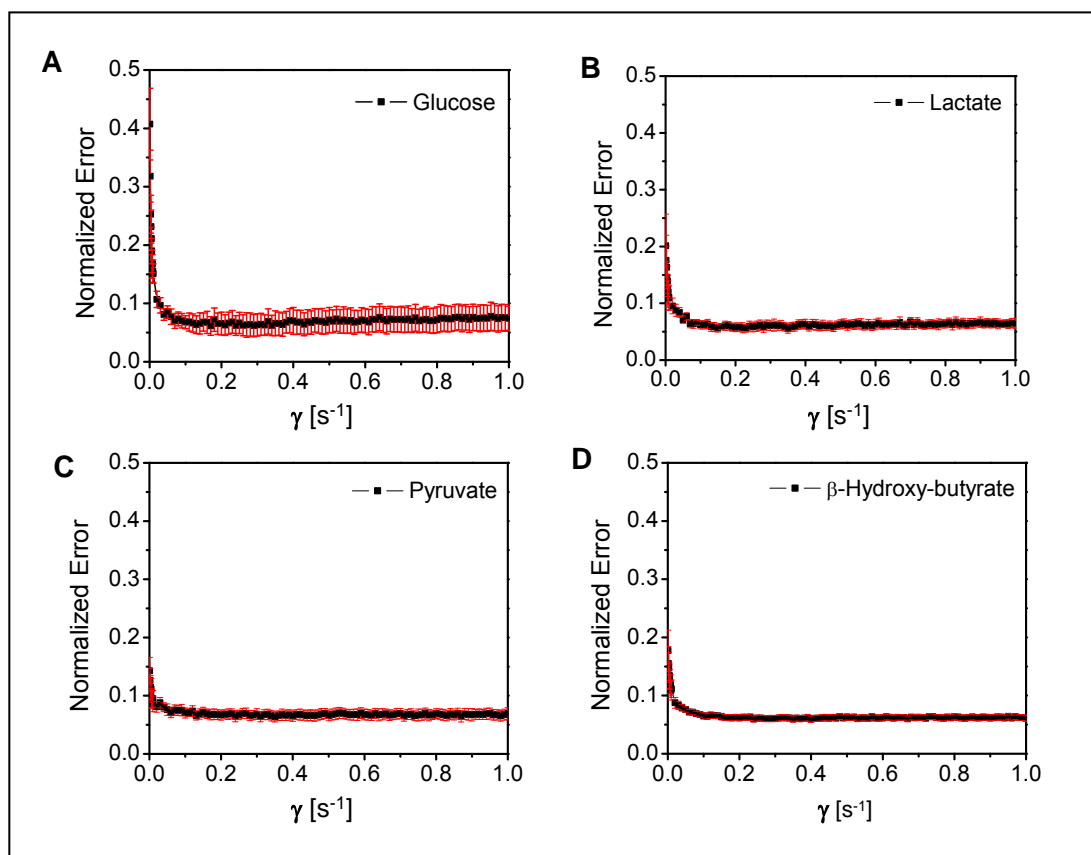

**Figure S7** Normalized error versus decay rate parameter  $\gamma$  for all myocytes with perfusion in glucose (A; n=9), lactate (B; n=7), pyruvate (C; n=10), or  $\beta$ -hydroxybutyrate (D; n=14). Standard errors are displayed in red.

proximity. Subsequent cross-correlation of the cluster ensemble's individual cosine of the forward modeled phase signals with that of the cosine of the ensemble's wavelet phase, rendered high correlation coefficients  $0.95 \pm 0.02$ ,  $0.81 \pm 0.04$ ,  $0.88 \pm 0.05$  and  $0.86 \pm 0.02$  for glucose-, pyruvate-, lactate- and  $\beta$ -hydroxybutyrate-perfused myocytes, respectively (Figure S9).

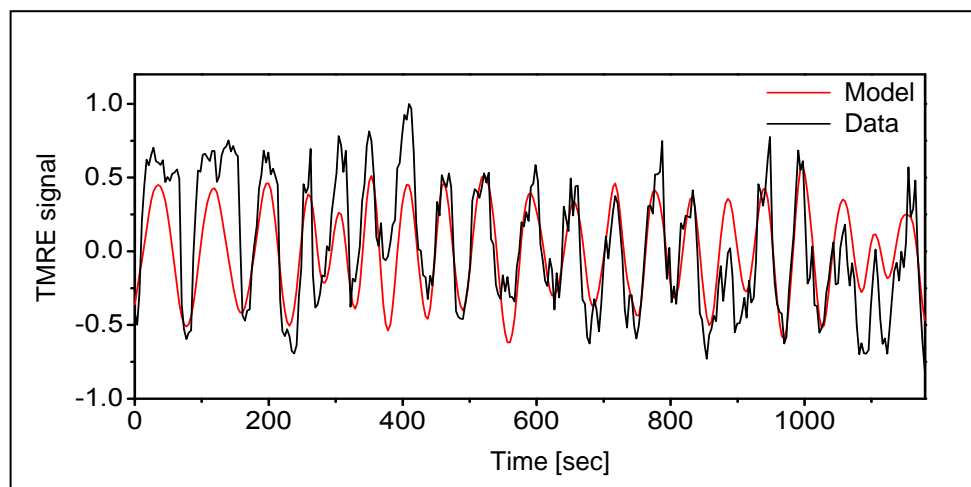

**Figure S8** Forward modeling with optimal decay rate parameter  $\gamma$  and model validity. Normalized fluorescence intensity from experimental data for a lactate-perfused myocyte (black). The TMRE signal was subtracted the median value of the distribution, and the corresponding signal was normalized respect to its maximum value. Forward modeled cosine phase signals from all mitochondria (red line).

### ***Spatio-temporal Properties of Local Coupling in Mitochondrial Frequency Clusters***

To further explore effects of inter-mitochondrial coupling on network organization, mitochondrial mean cluster coupling constants were plotted versus % cluster area and mean cluster frequency for each point in time (Figures S10 and S11). As detailed above, time-dependent cluster affiliation for mitochondria had been determined according to dynamic mitochondrial frequency behavior and not morphological proximity. Therefore, a quantification of inter-mitochondrial coupling for local environments with nearest-neighbor-coupling was not considered to necessarily imply a link with temporal cluster organization. In this work, coupling is considered to be mediated by ROS via a diffusion-based process (1, 19, 20).

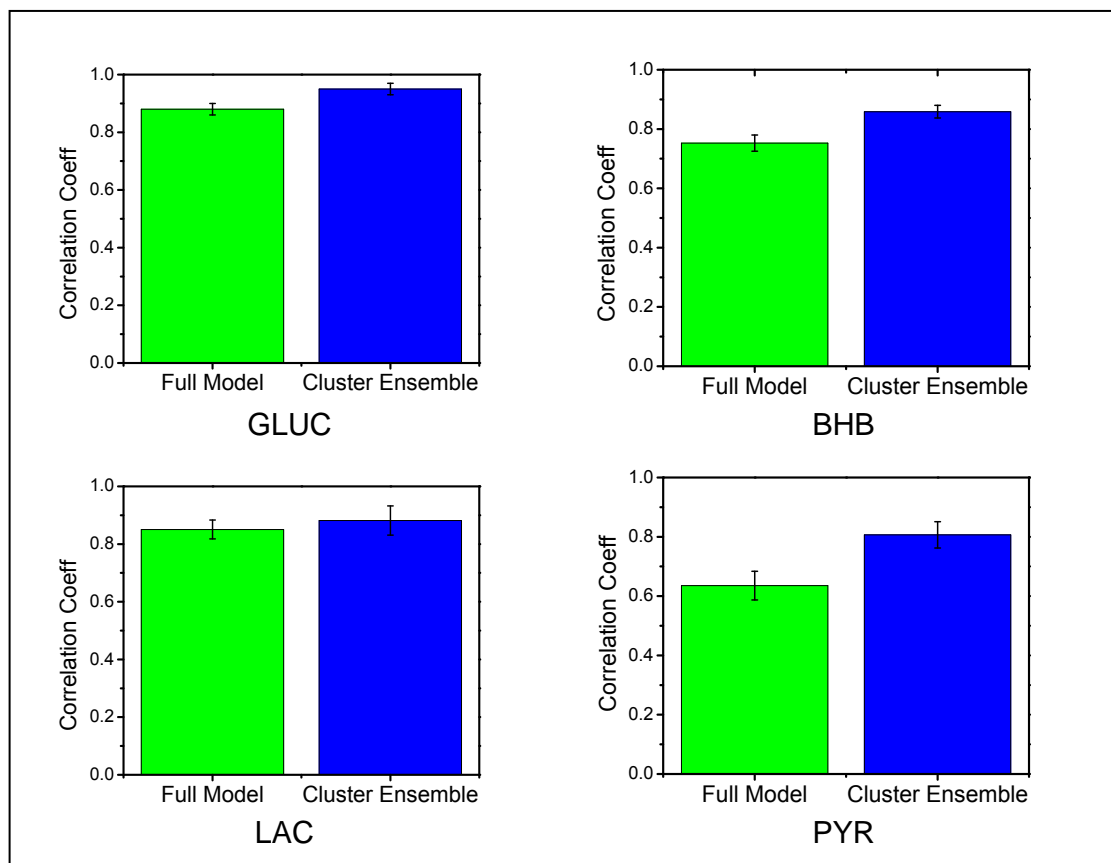

**Figure S9** Cross-correlation coefficients for forward modeled signal to the cosine of the wavelet-determined phase of the whole myocyte signal (right hand side bar in each panel) in glucose (GLUC),  $\beta$ -hydroxy butyrate (BHB), lactate (LAC) or pyruvate (PYR). Smaller correlation coefficients in pyruvate-perfused cardiac myocytes reveal limitations of the stochastic mitochondrial phase model for cardiac myocytes with both a high degree of frequency dispersion and a low degree of cluster contiguity. Only considering the 10 cluster mitochondria with the highest averaged signal cross-correlation to their nearest neighbors (left hand side bar in each panel) yields satisfying correlation coefficients since cluster contiguity is most likely ensured.

Linear polynomial fitting yielded a slightly ascending linear function for cluster coupling (in  $s^{-1}$ ) versus % cluster area with a slope of  $2.04 \cdot 10^{-2} \pm 0.53 \cdot 10^{-2} s^{-1}/\%$  for glucose-perfused myocytes (Figure S10). This tendency could be confirmed in myocytes perfused with lactate ( $4.98 \cdot 10^{-2} \pm 0.30 \cdot 10^{-2} s^{-1}/\%$ ) or pyruvate ( $4.63 \cdot 10^{-2} \pm 0.54 \cdot 10^{-2} s^{-1}/\%$ ). In these cases, inter-mitochondrial coupling grows with % cluster size indicating an overall increase in coupling strength for nearest-neighbor coupling leading to synchronization of the whole network. In contrast,  $\beta$ -hydroxybutyrate-perfused cardiac myocytes rendered a descending slope ( $-4.70 \cdot 10^{-2}$

$\pm 0.20 \cdot 10^{-2} \text{ s}^{-1}/\%$ ). This difference as compared to the other substrates indicates altered organizational principles of the mitochondrial network that may be governed by metabolic effects of  $\beta$ -hydroxybutyrate on the ROS-induced ROS release mechanism.

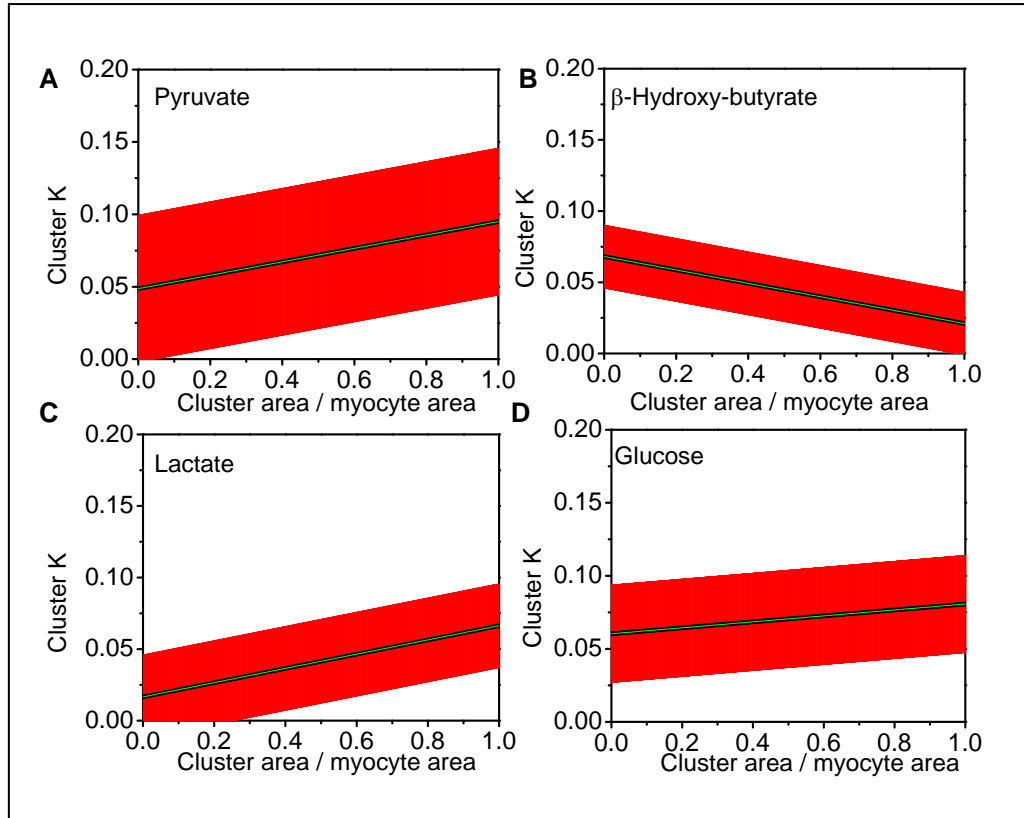

**Figure S10** Linear fit with standard errors (red) of mean mitochondrial cluster constant (in  $\text{s}^{-1}$ ) versus % cluster area for each point in time across all substrates, pyruvate (A),  $\beta$ -hydroxy-butyrate (B), lactate (C) or glucose (D). For glucose, pyruvate and lactate, inter-mitochondrial coupling grows with % cluster size, indicating an overall increase in coupling strength for nearest-neighbor coupling associated with synchronization of the whole network. However,  $\beta$ -hydroxybutyrate-perfused cardiac myocytes do not exhibit the same behavior indicating that cluster formation is influenced by additional redox or metabolic processes.

In contrast, linear regression on mitochondrial mean cluster coupling constants (in  $\text{s}^{-1}$ ) versus mean mitochondrial cluster frequency (in  $\text{mHz}$ ) gave a linear fit across the different substrates (Figure S11) with similar slopes of  $3.31 \cdot 10^{-3} \pm 0.1 \cdot 10^{-3} \text{ s}^{-1}\text{mHz}^{-1}$ ,  $3.14 \cdot 10^{-3} \pm 0.03 \cdot 10^{-3} \text{ s}^{-1}\text{mHz}^{-1}$ ,  $4.01 \cdot 10^{-3} \pm 0.09 \cdot 10^{-3} \text{ s}^{-1}\text{mHz}^{-1}$  and  $3.07 \cdot 10^{-3} \pm 0.04 \cdot 10^{-3} \text{ s}^{-1}\text{mHz}^{-1}$  for myocytes perfused with glucose, pyruvate, lactate and  $\beta$ -hydroxybutyrate, respectively. The results

indicate that the strength of local nearest-neighbor coupling is highest for cluster mitochondria oscillating at high frequency.

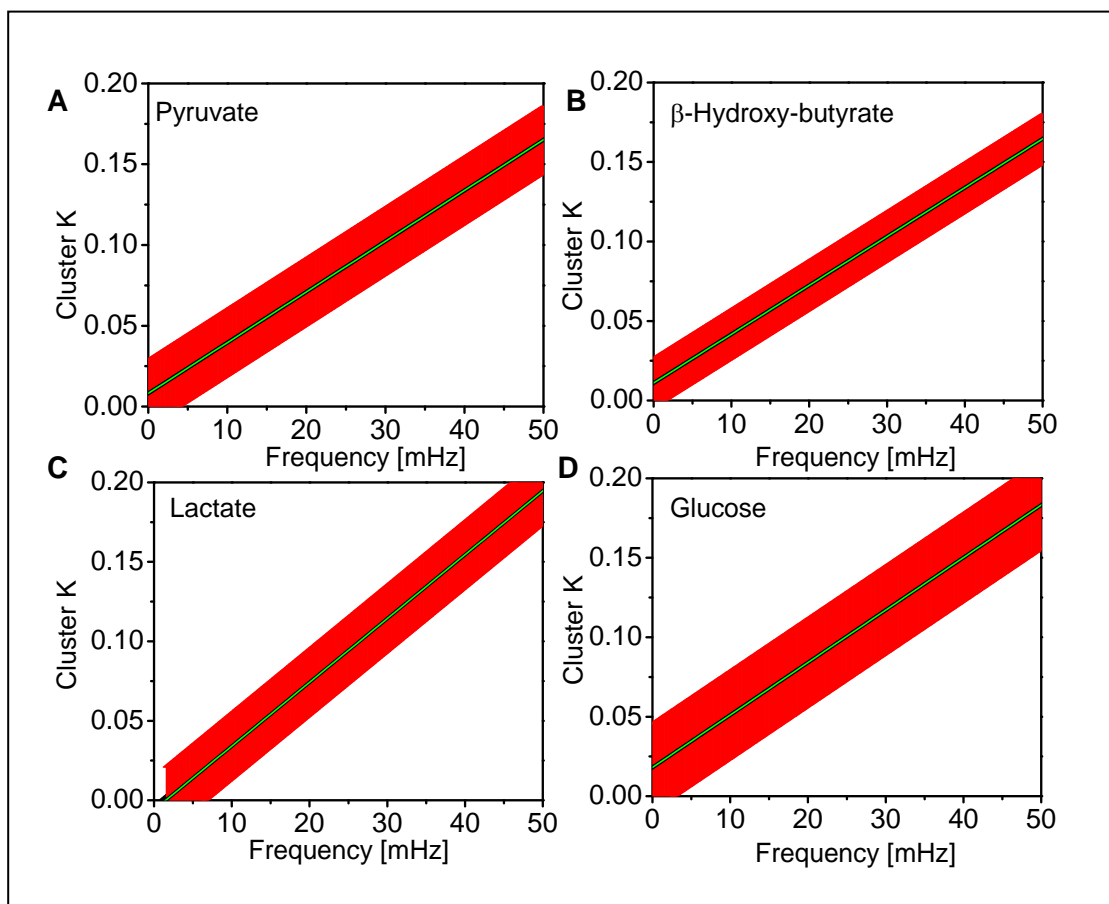

**Figure S11** Linear fit with standard errors of mean mitochondrial cluster coupling constant (in  $s^{-1}$ ) versus mean mitochondrial cluster frequency (in mHz) for each point in time and substrate pyruvate (A),  $\beta$ -hydroxy-butyrate (B), lactate (C) or glucose (D). In all substrates, higher frequencies are positively correlated with strong local nearest-neighbor coupling.



### Figures Legends

**Figure S1** Two-photon image of TMRE fluorescence from intact guinea pig heart tissue (different to the one shown in Figure 3 of the main text). (A) Within the intact heart tissue, cardiac myocytes were selected according to observed depolarizations. Myocyte borders along the sarcolemma and intercalated discs, as well as the mitochondrial grids were manually applied on a pixel-by-pixel basis. Yellow boxes mark the laser flashed region of the myocytes (see main text). Mitochondrial major cluster properties of the optical slice of perfused heart tissue shown in part A ( $n = 9$  cardiac myocytes). Displayed are the mean cluster radius versus frequency (B); the cluster area normalized by the full myocyte area versus frequency (C); the distribution of mitochondrial frequencies for all cluster mitochondria across all myocytes (D), and the cluster mitochondria count normalized by the total number of mitochondria for the major cluster versus frequency (E). A similar figure for another optical slice of the intact heart tissue can be found in the main text (Figure 1A and Figure 3).

**Figure S2** Mitochondrial mean cluster radius as a function of frequency. Isolated cardiac myocytes were imaged as described in Methods and perfused as described in the legend of Figure 4 with 10mM of pyruvate (A;  $n=10$ ),  $\beta$ -hydroxybutyrate (B;  $n=14$ ), lactate (C;  $n=7$ ), or glucose (D;  $n=9$ ).

**Figure S3** Mitochondrial cluster count normalized by the total number of mitochondria for the major cluster versus frequency for isolated cardiac myocytes perfused with 10mM of pyruvate (A;  $n=10$ ),  $\beta$ -hydroxybutyrate (B;  $n=14$ ), lactate (C;  $n=7$ ), or glucose (D;  $n=9$ ).

**Figure S4** Distribution of mitochondrial frequencies for all cluster mitochondria across all myocytes perfused with 10mM of pyruvate (A;  $n=10$ ),  $\beta$ -hydroxybutyrate (B;  $n=14$ ), lactate (C;  $n=7$ ), or glucose (D;  $n=9$ ).

**Figure S5** Coherence of mitochondria belonging to the major oscillating cluster, estimated at the mean cluster frequency, for 10mM of pyruvate (A;  $n=10$ ),  $\beta$ -hydroxybutyrate (B;  $n=14$ ), lactate (C;  $n=7$ ), or glucose (D;  $n=9$ ). To allow the statistical comparison between myocytes with unequal time recordings, the duration of the oscillations for each recording was normalized.

**Figure S6** Minimum error estimation of decay rate parameter  $\gamma$  in the interval  $[0,1]$   $s^{-1}$  for glucose, pyruvate, lactate and  $\beta$ -hydroxybutyrate respectively. (A) Normalized error of forward modeled  $\gamma$ -dependent stochastic phase model versus  $\gamma$  for a glucose-perfused cardiac myocyte. Exponential fit curve of type  $f(x) = a \cdot \exp(-bx) + c$  (green line). Step increase of  $0.01 s^{-1}$  starting from 0, the optimal decay rate parameter was chosen as the first  $\gamma$  whose error value was within 1% range of the value of the asymptotic error value (here,  $\gamma = 0.12 s^{-1}$ ). (B) Values of the optimal decay rate parameters for glucose-, pyruvate-,  $\beta$ -hydroxybutyrate- and lactate-perfused cardiac myocytes. The  $\gamma$  distributions were not significantly different to each other (one-way ANOVA: F-value = 0.14, p-value = 0.9366).

**Figure S7** Normalized error versus decay rate parameter  $\gamma$  for all myocytes with perfusion in glucose (A; n=9), lactate (B; n=7), pyruvate (C; n=10), or  $\beta$ -hydroxybutyrate (D; n=14). Standard errors are displayed in red.

**Figure S8** Forward modeling with optimal decay rate parameter  $\gamma$  and model validity. Normalized fluorescence intensity from experimental data for a lactate-perfused myocyte (black). The TMRE signal was subtracted the median value of the distribution, and the corresponding signal was normalized respect to its maximum value. Forward modeled cosine phase signals from all mitochondria (red line).

**Figure S9** Cross-correlation coefficients for forward modeled signal to the cosine of the wavelet-determined phase of the whole myocyte signal (right hand side bar in each panel) in glucose (GLUC),  $\beta$ -hydroxy butyrate (BHB), lactate (LAC) or pyruvate (PYR). Smaller correlation coefficients in pyruvate-perfused cardiac myocytes reveal limitations of the stochastic mitochondrial phase model for cardiac myocytes with both a high degree of frequency dispersion and a low degree of cluster contiguity. Only considering the 10 cluster mitochondria with the highest averaged signal cross-correlation to their nearest neighbors (left hand side bar in each panel) yields satisfying correlation coefficients since cluster contiguity is most likely ensured.

**Figure S10** Linear fit with standard errors (red) of mean mitochondrial cluster constant (in  $s^{-1}$ ) versus % cluster area for each point in time across all substrates, pyruvate (A),  $\beta$ -hydroxy-

butyrate (B), lactate (C) or glucose (D). For glucose, pyruvate and lactate, inter-mitochondrial coupling grows with % cluster size, indicating an overall increase in coupling strength for nearest-neighbor coupling associated with synchronization of the whole network. However,  $\beta$ -hydroxybutyrate-perfused cardiac myocytes do not exhibit the same behavior indicating that cluster formation is influenced by additional redox or metabolic processes.

**Figure S11** Linear fit with standard errors of mean mitochondrial cluster coupling constant (in  $s^{-1}$ ) versus mean mitochondrial cluster frequency (in mHz) for each point in time and substrate pyruvate (A),  $\beta$ -hydroxy-butyrate (B), lactate (C) or glucose (D). In all substrates, higher frequencies are positively correlated with strong local nearest-neighbor coupling.

### Table Captions

**Table S1** Stochastic phase model with drifting frequencies and time-dependent local mitochondrial coupling. (A) An extended Kuramoto model for the oscillator phases  $\varphi_m(t)$  and frequencies  $\omega_m(t)$  describes coupled circadian phase oscillators.  $N_m$  is the total number of nearest neighbors of mitochondrion  $m$ . The sum of the coupling term runs over all nearest neighbors  $j_m$  of mitochondrion  $m$ . The total luminescence signal  $s(t)$  is the sum of a population of all oscillators contributing an amplitude-normalized cosine signal.  $M$  is the total number of mitochondrial oscillators and the sum of cosines runs over all mitochondrial oscillators. (B) Parameter listing.  $K_m(t)$  represents the time-dependent local mitochondrial phase coupling constant.

**Table S2** Multi-Peak Gaussian fit analysis for peaks in the frequency distributions of cardiac myocytes perfused with different substrates. For each peak, the mean frequency  $\pm$  the FWHM are given in mHz.

### Supporting References

1. Aon, M. A., S. Cortassa and B. O'Rourke. 2006. The fundamental organization of cardiac mitochondria as a network of coupled oscillators. *Biophys. J.* 91: 4317-4327.
2. Aon, M. A., S. Cortassa, E. Marban and B. O'Rourke. 2003. Synchronized whole cell oscillations in mitochondrial metabolism triggered by a local release of reactive oxygen species in cardiac myocytes. *J. Biol. Chem.* 278: 44735-44744.
3. O'Rourke, B. R., B.M. and E. Marban. 1994. Oscillations of Membrane Current and Excitability Driven by Metabolic Oscillations in Heart Cells. *Science.* 265: 962–966.
4. Backx, P. H., W. D. Gao, M. D. Azan-Backx and E. Marban. 1994. Mechanism of force inhibition by 2,3-butanedione monoxime in rat cardiac muscle: roles of  $[Ca^{2+}]_i$  and cross-bridge kinetics. *J. Physiol.* 476: 487-500.
5. Slodzinski, M. K., M. A. Aon and B. O'Rourke. 2008. Glutathione oxidation as a trigger of mitochondrial depolarization and oscillation in intact hearts. *J. Mol. Cell. Cardiol.* 45: 650-660.
6. Kurz, F. T., M. A. Aon, B. O'Rourke and A. A. Armoundas. 2010. Wavelet analysis reveals heterogeneous time-dependent oscillations of individual mitochondria. *Am. J. Physiol. Heart Circ. Physiol.* 299: H1736-1740.
7. Kurz, F. T., M. A. Aon, B. O'Rourke and A. A. Armoundas. 2010. Spatio-temporal oscillations of individual mitochondria in cardiac myocytes reveal modulation of synchronized mitochondrial clusters. *Proc. Natl. Acad. Sci. USA.* 107: 14315-14320.
8. Garcia-Ojalvo, J., M. B. Elowitz and S. H. Strogatz. 2004. Modeling a synthetic multicellular clock: repressilators coupled by quorum sensing. *Proc. Natl. Acad. Sci. USA.* 101: 10955-10960.
9. Rougemont, J. and F. Naef. 2007. Dynamical signatures of cellular fluctuations and oscillator stability in peripheral circadian clocks. *Mol. Syst. Biol.* 3: 93.
10. Suel, G. M., J. Garcia-Ojalvo, L. M. Liberman and M. B. Elowitz. 2006. An excitable gene regulatory circuit induces transient cellular differentiation. *Nature.* 440: 545-550.

11. Rougemont, J. and F. Naef. 2006. Collective synchronization in populations of globally coupled phase oscillators with drifting frequencies. *Phys. Rev. E* 73: 011104.
12. Lemons, D. 2002. *An Introduction to Stochastic Processes in Physics*. The Johns Hopkins University Press. Baltimore and London.
13. Hong, H. and S. H. Strogatz. 2011. Kuramoto model of coupled oscillators with positive and negative coupling parameters: an example of conformist and contrarian oscillators. *Phys. Rev. Lett.* 106: 054102.
14. Kuramoto, Y. 1984. *Chemical oscillations, waves, and turbulence*. Springer-Verlag. Berlin.
15. O'Leary, D. P. 2001. Near-optimal parameters for Tikhonov and other regularization methods. *SIAM J. Sci. Comput.* 23: 1161 - 1171.
16. Park, H. W., S. Shin and H. S. Lee. 2001. Determination of an optimal regularization factor in system identification with Tikhonov regularization for linear elastic continua. *Int. J. Numer. Meth. Eng.* 51: 1211-1230.
17. Aon, M. A., S. Cortassa, F. G. Akar and B. O'Rourke. 2006. Mitochondrial criticality: a new concept at the turning point of life or death. *Biochim. Biophys. Acta.* 1762: 232-240.
18. Aon, M. A., S. Cortassa and B. O'Rourke. 2004. Percolation and criticality in a mitochondrial network. *Proc. Natl. Acad. Sci. USA.* 101: 4447-4452.
19. Zhou, L., M. A. Aon, T. Almas, S. Cortassa, R. L. Winslow and B. O'Rourke. 2010. A Reaction-Diffusion Model of ROS-Induced ROS Release in a Mitochondrial Network. *PLoS Comput. Biol.* 6: e1000657.
20. Fang, H., M. Chen, Y. Ding, W. Shang, J. Xu, X. Zhang, W. Zhang, K. Li, Y. Xiao, F. Gao, S. Shang, J.-C. Li, X.-L. Tian, S.-Q. Wang, J. Zhou, N. Weisleder, J. Ma, K. Ouyang, J. Chen, X. Wang, M. Zheng, W. Wang, X. Zhang and H. Cheng. 2011. Imaging superoxide flash and metabolism-coupled mitochondrial permeability transition in living animals. *Cell Res.* 21: 1295-1304.
